1 A map of climate change-driven natural  
2 selection in *Arabidopsis thaliana*

3 Moises Exposito-Alonso<sup>1</sup>, Hernán A. Burbano<sup>2</sup>, Oliver Bossdorf<sup>3</sup>, Rasmus Nielsen<sup>4</sup>, Detlef  
4 Weigel<sup>1\*</sup>

5 <sup>1</sup>Department of Molecular Biology, Max Planck Institute for Developmental Biology, 72076 Tübingen,  
6 Germany.

7 <sup>2</sup>Research Group of Ancient Genomics and Evolution, Max Planck Institute for Developmental  
8 Biology, 72076 Tübingen, Germany.

9 <sup>3</sup>Institute of Evolution and Ecology, University of Tübingen, 72076 Tübingen, Germany.

10 <sup>4</sup>Departments of Integrative Biology and Statistics, University of California Berkeley, Berkeley, CA  
11 94720, USA. Natural History Museum of Denmark, Øster Voldgade 5-7, 1350 København K, Denmark

12 \*correspondence to: [weigel@weigelworld.org](mailto:weigel@weigelworld.org)

13 Keywords: *Arabidopsis thaliana*, climate change, environmental niche models, field experiments,  
14 genetic natural selection, selection scan.

15 Running title: A map of climate change-driven natural selection

16 **Through the lens of evolution, climate change is an agent of directional selection that forces**  
17 **populations to change and adapt, or face extinction. Current assessments of the risks associated**  
18 **with climate change<sup>1,2</sup>, however, do not typically take into account that natural selection can**  
19 **dramatically impact the genetic makeup of populations<sup>3</sup>. We made use of extensive genome**  
20 **information in *Arabidopsis thaliana* and measured how rainfall-manipulation affected the fitness**  
21 **of 517 natural lines grown in Spain and Germany. This allowed us to directly infer selection at the**  
22 **genetic level<sup>4</sup>. Natural selection was particularly strong in the hot-dry Spanish location, killing 63%**  
23 **of lines and significantly changing the frequency of ~5% of all genome-wide variants. A significant**  
24 **proportion of this selection over variants could be predicted from climate (mis)match between**  
25 **experimental sites and the geographic areas of where variants are found ( $R^2=29-52\%$ ).**  
26 **Field-validated predictions across the species range indicated that Mediterranean and Western**  
27 **Siberia populations — at the edges of the species' environmental limits — currently experience the**  
28 **strongest climate-driven selection, and Central Europeans the weakest. With rapidly increasing**  
29 **droughts and rising temperatures in Europe<sup>5</sup>, we forecast a wave of directional selection moving**  
30 **North, putting many native *A. thaliana* populations at evolutionary risk.**

31 To predict the future impact of climate change on biodiversity, the typical starting point has been  
32 climatic tolerances inferred from the current species distributions. These tolerances are usually  
33 treated as static, and risks are assessed based on whether species' environmental niches will  
34 shrink<sup>1,2</sup> or shift faster than the species can migrate<sup>1,6</sup>. However, these approaches do not account  
35 for within-species genetic variation, and for natural selection causing species to genetically change  
36 and adapt over time<sup>3</sup>. To predict the “evolutionary impact” of climate change on a species, i.e. how  
37 much genetic change is required for adaptation to climate change, we thus need to quantify and  
38 model environment-driven natural selection at the genetic level. Thanks to species-wide genome  
39 scans<sup>7-9</sup>, as well as genome associations with climate of origin<sup>10-14</sup>, we increasingly understand the  
40 genomic basis of past selection and climate adaptation, which has been used to estimate future  
41 adaptation debt or “genomic vulnerability”<sup>10,11</sup>.

42 Natural selection, however, is only indirectly inferred in the types of analyses discussed  
43 above. The best way to directly quantify selection in a specific environment is provided by field  
44 experiments in which multiple genotypes of a species are grown together in a common environment  
45<sup>15,16</sup>. With such experiments, relative fitness can be directly associated with genetic variation across  
46 populations<sup>4,17-19</sup>. Ideally, one would carry out such field experiments at many different sites  
47 throughout the species range, but this is rarely practical<sup>20</sup>. Nevertheless, an emergent finding is that  
48 individuals are normally locally adapted and that local genotypes are often positively selected over

49 foreigners in their “home” environment, while negatively selected in their “away”  
50 environments<sup>21,22</sup>. An intuitive conclusion is that it should be possible to derive a metric of natural  
51 selection from the extent of change in local climate at an individual’s home. Here we combine  
52 high-throughput associations of genome and current climate variation with experimentally quantified  
53 *in situ* natural selection in the plant *Arabidopsis thaliana*. We exploit these associations to forecast  
54 natural selection driven by future climate change, and how it impacts the genomic variation of a  
55 species across its geographic range — what we interpret as a new metric of evolutionary risk of  
56 populations.

57 To study climate change-driven natural selection in the annual plant *A. thaliana*, we  
58 performed two common garden experiments for one generation in two climatically distinct field  
59 stations, at the warm edge of the species distribution in Madrid (Spain, [40.40805°N -3.83535°E](#)), and  
60 at the distribution center in Tübingen (Germany, [48.545809°N 9.042449°E](#)) (for details see ref. 20). At  
61 each site, we simulated high precipitation typical of a wet year in Germany, and low precipitation  
62 typical of a dry year in Spain (see Fig. 2 of ref. 20). In fall of 2015 we sowed over 300,000 seeds of 517  
63 natural lines capturing species-wide genomic diversity<sup>23</sup>. For each line, we prepared seven pots in  
64 which only a single plant was retained after germination, and five pots with exactly 30 seeds that  
65 were allowed to germinate and grow without intervention. At the end of the experiment in June  
66 2016, we had collected data from 23,154 pots, consisting of survival to the reproductive stage, the  
67 number of seeds per surviving plant (fecundity), and lifetime fitness (the product of survival and  
68 individual fecundity). Heritability of fitness traits was generally higher in the most stressful  
69 environment, which was defined by reduced survival ( $0.00 < H^2 < 0.551$ ; [Table S3](#)), i.e., in Spain under  
70 low precipitation and at high density. In this environment, only 193 of the 517 accessions survived,  
71 whereas in Germany at least a few plants of each accession reproduced.

72 In each experimental environment, we quantified genome-wide selection at the genetic level  
73 based on the difference in relative fitness of lines with the minor and the major allele at each  
74 genomic position (1,353,386 biallelic SNPs across 515 lines with high-quality genome information)  
75 ([Fig. 1](#)). Our approach identifies both causal variants, as well as many more variants that are in  
76 significant linkage disequilibrium (LD) with causal variants<sup>24,25</sup> — due to so-called background  
77 selection or genetic hitchhiking. We use the term *allelic selection differentials* ( $s$ , called total  
78 selection by Thurman and Barrett<sup>4</sup>), to denote the realized selection affecting each SNP resulting  
79 from the combination of selection acting directly on the focal variant, and the indirect effects due to  
80 selection on causal SNPs that are in LD with the focal variant. Calculating allelic selection differentials  
81 using Linear Models (LM-GEMMA, ref. 26, see [Supplemental Methods V.3](#)), we found a total of

82 421,962 SNPs with allelic selection differentials below a 0.05 significance threshold (Benjamini &  
83 Hochberg FDR correction) in at least one of the eight environments (see [Table S2](#)). Using more  
84 stringent Bonferroni correction ( $<7 \times 10^{-7}$ ), we still detected 6,538 SNPs distributed throughout the  
85 genome, suggesting that the polygenic model of natural selection<sup>27</sup> prevails in this  
86 climate-manipulation experiment. These high numbers are not surprising, given that we expect to  
87 capture many SNPs that are only indirectly selected. Thinking about our experiment as studying a  
88 population of plants with multiple genotypes, the change of allele frequencies in response to one  
89 generation of selection would be up to 10% in Spain and low precipitation, while it would not exceed  
90 2% in the benign high-precipitation environment in Germany (see [Supplemental Methods V](#), [Fig. S9](#)).  
91 While variants inferred to be under positive or negative selection after Bonferroni-correction were  
92 overall more likely to be located in intergenic regions than in genes (Fisher's Exact test Odds ratio  
93 [Odds]=1.11,  $P=7 \times 10^{-30}$ ), such variants were enriched for nonsynonymous mutations (Odds=1.05,  
94  $P=2 \times 10^{-4}$ ). The large number of variants affected by selection implies a strong turnover of variation  
95 across the entire genome as a response to the environment<sup>28,29</sup>, and a potentially significant  
96 demographic decimation — what Haldane called “the demographic cost of natural selection”<sup>30</sup>.

97 Changes in allele frequency are not only determined by the adaptive value of a variant but  
98 also the alleles it is linked to. We therefore improved the detection of direct targets of selection by  
99 correcting for LD-driven effects<sup>25,31</sup> using Bayesian Sparse Linear Mixed Model associations with  
100 relative fitness (BSLMM-GEMMA, ref. 31), see [Supplemental Methods V](#)). This analysis indicated that  
101 the fraction of the genome likely to be a target of selection was only  $8 \times 10^{-5}$ — $5 \times 10^{-6}$ . This fraction  
102 was much smaller than what we had identified with significant allelic selection differentials  
103 ( $2 \times 10^{-5}$ —0.001), confirming that selection must be mostly indirect<sup>4,32,33</sup>.

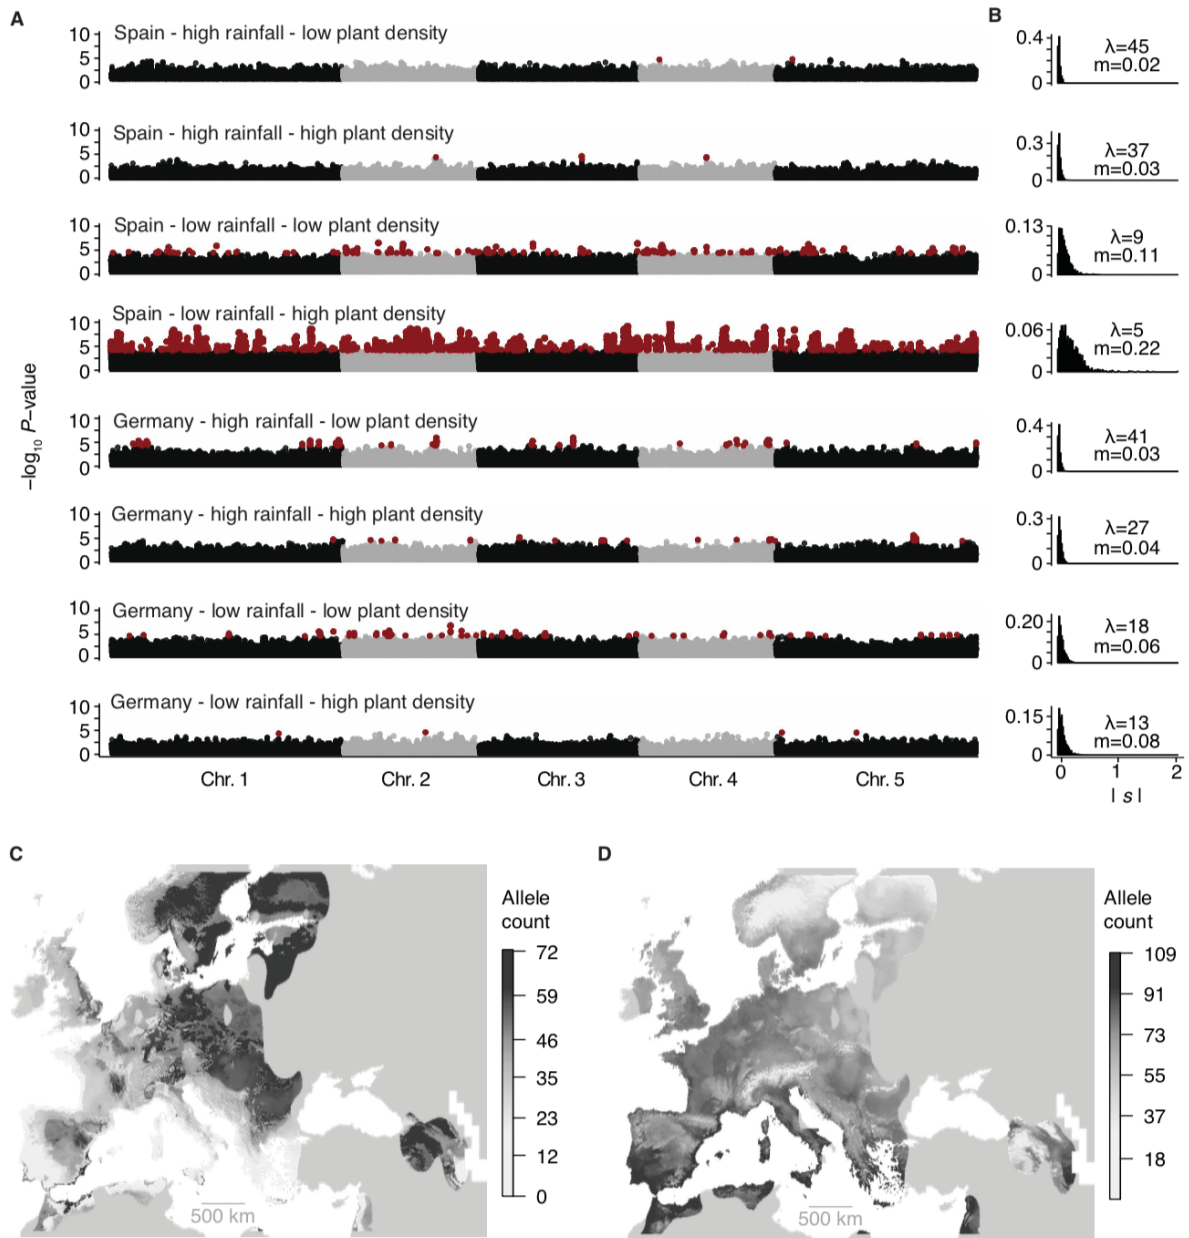

104 **Fig. 1 A genome map of allelic selection differentials.** (A) Manhattan plots of SNPs significantly associated with  
 105 relative lifetime fitness in eight different environments. SNPs significant after FDR (black and grey) or  
 106 Bonferroni correction (red) are shown. For genome-wide scans of survival and fecundity fitness see Figures [S4](#)  
 107 and [S5](#). (B) Distribution of absolute allelic selection differentials  $|s|$  per experiment.  $\lambda$  denotes maximum  
 108 likelihood-inferred parameter of an exponential distribution, and  $m$  denotes the mean allelic selection  
 109 differential. (C, D) Environmental niche models for the most significant SNPs in each 0.5 Mb window of the  
 110 genome. (C) 424 windows had significant SNPs in high-precipitation experiments. (D) 279 windows had  
 111 significant SNPs in low-precipitation experiments.

112 We studied whether the direction and intensity of selection was dependent on the  
 113 experimental environment. Alleles that were positively selected under low precipitation tended to be

114 negatively selected under high precipitation, and vice versa, so called antagonistic pleiotropy<sup>18</sup> (Fig.  
115 [2](#), Fisher's exact test Odds Ratios >1.31,  $P < 4 \times 10^{-24}$ ; Table S5) — an observation particularly clear  
116 when comparing the two most "natural" conditions, low precipitation in Spain and high precipitation  
117 in Germany (Odds Ratio=6.72). In contrast, when we compared the same precipitation condition  
118 between the two locations, selection was either in the same direction ( $0.23 < \text{Pearson's } r < 0.51$ ), or  
119 there was selection in one environment and neutrality in the other, displaying conditional neutrality  
120 (All Odds ratio < 1,  $P < 10^{-16}$ ). Together, this indicates opposite selection across precipitation but not  
121 temperature gradients. This is an important observation, because it tells us that nature cannot select  
122 for generalist genotypes that are successful in wide range of precipitation environments.

123 To study whether short-term selection in our experiments aligns with genomic footprints of  
124 past selection (see Supplemental Methods [III](#) and [VII](#)), we searched for selective sweeps (ref. 34), for  
125 outlier allele frequency differentiation ( $F_{ST}$ ) between eleven previously defined *A. thaliana* genetic  
126 groups<sup>10,23</sup>, and for climate-genome associations (GWA with 1960-1990 climate averages,  
127 [worldclim.org](http://worldclim.org) v.1, ref. 35). Comparing frequency-matched background SNPs with  
128 Bonferroni-corrected significant SNPs for allelic selection differentials, we found that the latter had  
129 higher average  $F_{ST}$  values (0.39 compared to 0.14, Wilcoxon test,  $P < 10^{-16}$ ), but were not any more  
130 likely to have experienced a selective sweep ( $P=0.2$ ) (Fig. [2](#), Fig. [S7-8](#)). Absolute values of allelic  
131 selection differentials were significantly higher for strongly climate-correlated SNPs (e.g. annual  
132 precipitation [bio1] and temperature [bio12]: Spearman's  $r=0.12$ ,  $p < 16$ ). The 1% top hits for climate  
133 associations also had higher  $F_{ST}$  values than frequency-matched background SNPs (e.g. bio1 and  
134 bio12:  $P < 10^{-5}$ ), but no differences in sweep likelihood ( $P=0.9$ ). Implementing genome-wide  
135 environmental niche models<sup>10</sup> (see Supplemental Methods [VII](#)), we found that alleles selected in  
136 Germany and high precipitation were more likely to come from higher latitudes (Fig. [1C](#)), while the  
137 opposite was true for alleles selected in Spain and low precipitation (Fig. [1D](#)). In agreement, similarity  
138 in precipitation regime was a good predictor for alleles selected in Spain (bio 12-19; Spearman's  
139  $r=-0.18$ ,  $P < 10^{-16}$ ; (Fig. [2D](#)) (for other experiments, see Fig. [S10](#)). All in all, the signature that allelic  
140 selection differentials coincide with allele frequency shifts across population lineages are most easily  
141 reconciled with a polygenic model of natural selection<sup>28</sup>.

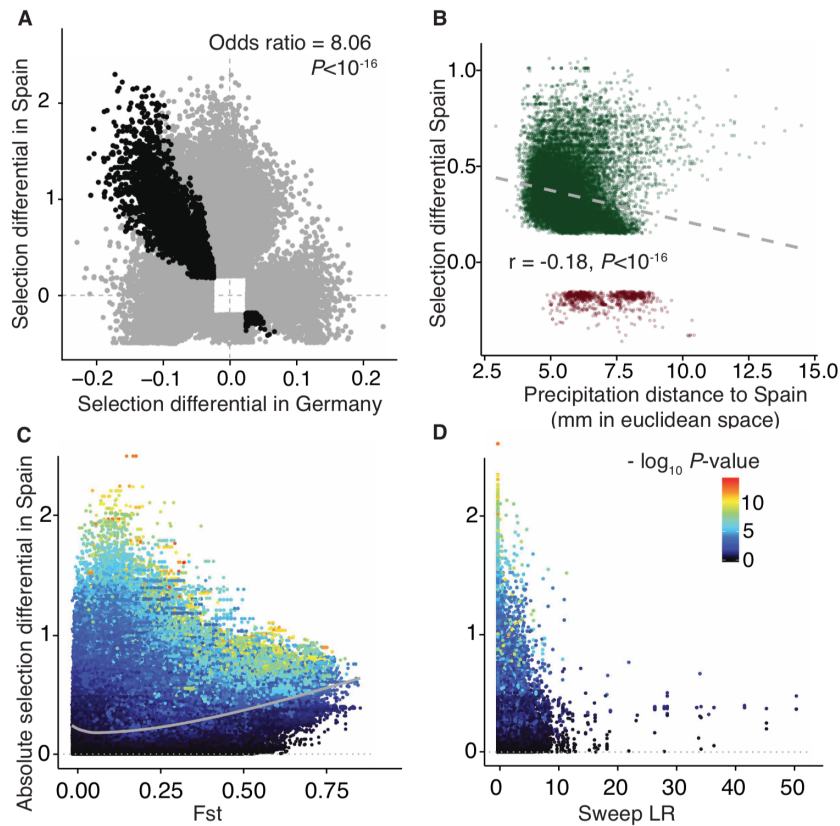

142 **Fig. 2 Selection trade-offs and the signal of environmental local adaptation.** (A) Empirical selection  
143 coefficients across two contrasting environments; Spain with low precipitation and high population density, and  
144 Germany with high precipitation and low population density. Grey dots indicate SNPs with significant  
145 conditional neutrality, black dots indicate SNPs with antagonistic pleiotropy. SNPs that behave in the same  
146 direction or that were non-significant in both environments are not plotted. (B) Correlation between field  
147 selection differentials and climate distances between test site and the centroids of SNPs' geographic ranges (n=  
148 54,146 FDR significant SNPs). (C) Relationship between field absolute allelic selection differentials and  $F_{ST}$   
149 values across 11 lineages, and (D) the likelihood ratio of selective sweeps. In all panels except (B), all 1,353,386  
150 SNPs are plotted.

151 We finally aimed to build an environmental model that can predict allelic selection  
152 differentials based on the climate and diversity patterns. We used as predictors the per-allele  
153 associations with climate of origin from climatic GWA as well as the signatures of past selection at  
154 each SNP,  $F_{ST}$ ,  $\pi$ , and sweep likelihood, and their genome annotations — all predictors were  
155 derived from public databases ([worldclim.org](http://worldclim.org), [1001genomes.org](http://1001genomes.org), [arabidopsis.org](http://arabidopsis.org)). We used a  
156 regression with decision trees using Random Forests to build Genome-wide Environment Selection  
157 (“GWES”) models. Conceptually, GWES models are similar to concepts related to Environmental  
158 Niche Models (ENMs), but instead of training them with presence/absence data of a genetic  
159 variant<sup>10,11</sup>, we trained them with our measured allelic selection differentials. This provided a means  
160 to predict whether alleles should increase/decrease in frequency in a certain climate, instead of

161 merely an indication of whether alleles are likely to be present, which is the indirect ENMs' version.  
162 By training models jointly with experimental data from Spain and Germany and using  
163 cross-validation, we confirmed that inferred and measured selection differentials were correctly  
164 predicted, with a high correlation accuracy ( $0.56 < \text{Pearson's } r < 0.7$ ) and explaining a large  
165 proportion of variance ( $R^2 = 29\text{-}52\%$ ) ([Fig. 3A](#), variable importance [Table S5](#)) (further details in  
166 [Supplemental Methods VIII](#)). To further validate the predictive accuracy of our models, we made use  
167 of published fitness data for different sets of natural lines that had been grown at different locations  
168 in Spain, Germany and England<sup>36,37</sup>. Using these data and GWES predictions, we confirmed  
169 moderate predictability ( $7\% < R^2 < 36\%$ )<sup>38</sup>. Predictability of GWES models increased when including  
170 data from all six experiments ( $17\% < R^2 < 84\%$ ) ([Fig. 3A](#), [Fig. S12 Table S10](#)) (for further details on  
171 predictability analyses and null expectations, see [Fig. S12-13, Supplemental Methods IX.4-5](#)).



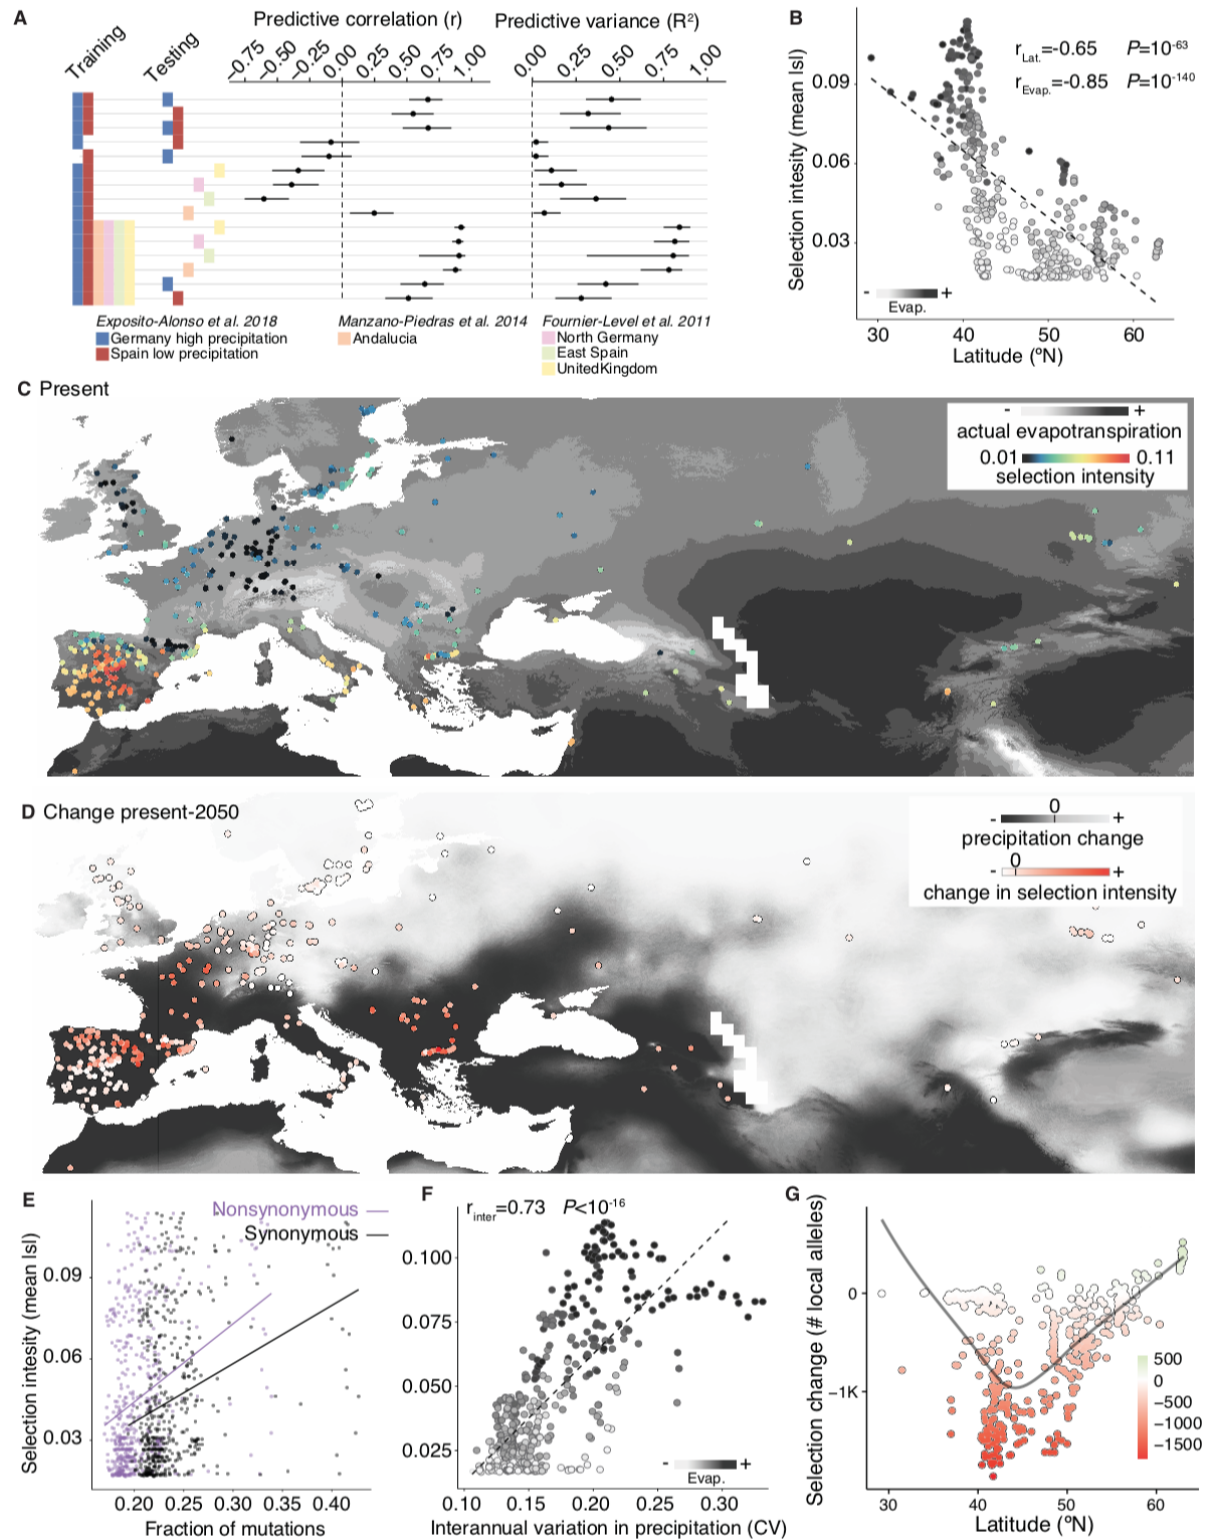

172 **Fig. 3 A geographic map of climate-driven selection and its predictability.** (A) Genome-wide Environment  
 173 Selection (GWES) models trained with a combination of environments, to infer allelic selection differentials  
 174 throughout the species range. Mean predicted allelic selection differentials (“selection intensity”;  $n = 10,752$   
 175 SNPs, one random SNP per 10 kb windows) in known locations of *A. thaliana* populations in relationship to (B)  
 176 latitude, and (C) evapotranspiration in summer (C) (ref. 35). (D) Predicted changes in selection intensity by 2050

177 (2050 MP rcp 8.5, ref. 35). (E) Relationship between selection intensity and synonymous and nonsynonymous  
178 polymorphisms. (F) Relationship between selection intensity and interannual variation in precipitation from  
179 1958-2017 (ref. 39). (G) Number of local alleles whose selection predicted to positively or negative change (>5%  
180 in relative fitness) in 2050 across the latitudinal range.

181 Using the trained GWES models, we then predicted genetic natural selection at hundreds of  
182 locations, simulating field experiments in which the same set of diverse natural lines is challenged by  
183 different local climates (Fig. 3). The intensity of selection, i.e. genome-wide average allelic selection  
184 differentials, was strongest towards the environmental limits of the species, i.e. in hot (annual  
185 temperature,  $r=0.62$ ,  $P<10^{-16}$ ), dry (annual precipitation,  $r=-0.457$ ,  $P=10^{-27}$ ), and high  
186 evapotranspiration locations (actual evapotranspiration in August,  $r=0.86$ ,  $P<10^{-16}$ ) (Fig. 3B-C). High  
187 selection intensity coincided with locations where natural lines have a lower-than-average ratio of  
188 nonsynonymous to synonymous polymorphisms (Fig. 3E,  $r=-0.276$ ,  $3\times 10^{-10}$ ). This depletion of  
189 nonsynonymous substitutions, which are expected to be on average more deleterious than  
190 synonymous substitutions, provides independent evidence for natural selection having acted more  
191 efficiently in these local populations. High selection intensity also correlated with high local genetic  
192 diversity  $\pi$  ( $r=-0.01$ ,  $P=0.85$ ) and elevated Tajima's D ( $r=0.161$ ,  $P=3\times 10^{-4}$ ). This could be explained by  
193 the differential age of populations<sup>10,40</sup> and/or by the direction of selection having fluctuated over  
194 time, with alternative polymorphisms having been selected in each period<sup>41</sup>. Inspection of  
195 precipitation data from 1958 to 2017 (ref. 39) revealed that locations where we had inferred strong  
196 selection and high diversity often suffered high year-to-year climatic variation ( $r=-0.73$ ,  $P<10^{-16}$ ; Fig.  
197 3F). This finding not only highlights how important temporal resolution in climate databases is for  
198 predictions, but also that climate stochasticity is a source of evolutionary constraints over species.  
199 Increased drift due to small population sizes is often thought to be the major force in shaping genetic  
200 diversity at range edges<sup>42</sup>. The patterns in *A. thaliana* are more consistent with proposals that a  
201 species' environmental niche<sup>43</sup> and its populations' genetic diversity<sup>44,45</sup> are primarily shaped by  
202 increasing natural selection towards the range edges.

203 A sudden change in climate or increased climate variability<sup>46,47</sup> will obviously increase the  
204 magnitude of natural selection. Using climate projections of 2050 as a proxy for potentially abrupt  
205 changes in local climate (Intergovernmental Panel on Climate Change, [www.ipcc.ch](http://www.ipcc.ch), ref. 5,35), we  
206 predict that selection intensity will likely increase in much of Southern-Central Europe, with an  
207 expected decrease in annual precipitation and increase in annual temperatures (Fig. 3D, Fig. S3; Fig.  
208 S11). To enable comparability across locations, our metric of selection intensity is standardized based  
209 on the same set of diverse accessions (Fig. 3C-D). Local populations typically consist of more closely  
210 related lines that harbor only a subset of genetic variants, which may put these populations either in

211 a better or worse position to respond to future climate than our global set of more diverse lines. We  
212 therefore looked for SNPs predicted to change most strongly in selection by 2050 (fitness advantage  
213 or disadvantage changed over 5%), and evaluated whether the allele positively changing in selection  
214 is locally present (Fig. 3G, Fig. S14). We found that most local alleles will become more negatively  
215 selected; we therefore predict that the degree of local adaptation will decrease for many native  
216 populations (Fig. 3G), leading to an adaptation deficit.

## 217 **Conclusion**

218 The expected changes in climate during the 21<sup>st</sup> century will threaten the survival of many species.  
219 Because the distribution of genetic diversity is so well characterized in *A. thaliana*, we have used it to  
220 address the challenge of predicting the effects of climate-driven natural selection genomic variation  
221 across a species' range. Integration of genome-climate associations with direct fitness observations  
222 allowed us to build models that directly predict selection at the genetic level rather than mere  
223 probability of presence/absence of variants. This information enabled us to infer range-wide  
224 evolutionary vulnerability in the face of rapid climate change. The first two steps in our project,  
225 assembling a range-wide collection and genome sequencing of a number of diverse lines, are in  
226 reach for many species of plants. A greater challenge is the generation of fitness data, but this can be  
227 partially solved by identifying particularly informative field sites — as we have done in our study —  
228 and by exploiting the immense progress in field phenotyping at different scales<sup>48,49</sup>. Combining such  
229 observations with our new genome-wide environment modeling approach will help us to fully  
230 incorporate evolution into predicting the impacts of climate change on biodiversity.

## 231 **ADDITIONAL INFORMATION**

232 **Accession codes.** Phenotypic datasets are available as supplemental material of ref. 20 at [update  
233 link to journal] with doi: [update]. Genomes are available at  
234 <http://1001genomes.org/data/GMI-MPI/releases/v3.1/>. The seed collection can be obtained from  
235 the Arabidopsis Biological Resource Center (ABRC) under accession [CS78942](https://abrc.org/CS78942). The GWA scans for  
236 fitness and climate variables will be deposited at [aragwas.1001genomes.org](http://aragwas.1001genomes.org).

237 **Author contribution** MEA, HAB and DW conceived the project outline. MEA designed, implemented  
238 and coordinated the project. MEA carried out the experiment in Tübingen and in Madrid with  
239 technical support. MEA carried out statistical analyses. HAB, OB, RN, and DW supervised the project  
240 and discussed analyses interpretation. MEA prepared the first draft and the final manuscript was  
241 written by MEA, HAB, OB, RN, and DW.

242 **Acknowledgements** We gratefully thank all field helpers, Patricia Lang and Angela Hancock for  
243 comments on the manuscript, and the Weigel and Burbano labs for discussions.

244 **Funding statement** This work was funded by an EMBO ST fellowship (MEA), ERC Advanced Grant  
245 IMMUNEMESIS and the Max Planck Society (DW).

246 **Disclosure statement** The authors declare no competing financial interests. The funders had no role  
247 in study design, data collection and analysis, decision to publish, or preparation of the manuscript.

## 248 REFERENCES

- 249
1. Urban, M. C. Climate change. Accelerating extinction risk from climate change. *Science* **348**, 571–573 (2015).
  2. Warren, R., Price, J., Graham, E., Forstenhaeusler, N. & VanDerWal, J. The projected effect on insects, vertebrates, and plants of limiting global warming to 1.5°C rather than 2°C. *Science* **360**, 791–795 (2018).
  3. Hoffmann, A. A. & Sgrò, C. M. Climate change and evolutionary adaptation. *Nature* **470**, 479–485 (2011).
  4. Thurman, T. J. & Barrett, R. D. H. The genetic consequences of selection in natural populations. *Mol. Ecol.* **25**, 1429–1448 (2016).
  5. Intergovernmental Panel on Climate Change. *Climate Change 2013 - The Physical Science Basis: Working Group I Contribution to the Fifth Assessment Report of the Intergovernmental Panel on Climate Change*. (Cambridge University Press, 2014). doi:10.1017/CBO9781107415324
  6. Jezkova, T. & Wiens, J. J. Rates of change in climatic niches in plant and animal populations are much slower than projected climate change. *Proc. R. Soc. B* **283**, 20162104 (2016).
  7. Nielsen, R. *et al.* Genomic scans for selective sweeps using SNP data. *Genome Res.* **15**, 1566–1575 (2005).
  8. Horton, M. W. *et al.* Genome-wide patterns of genetic variation in worldwide *Arabidopsis thaliana* accessions from the RegMap panel. *Nat. Genet.* **44**, 212–216 (2012).
  9. Bonhomme, M. *et al.* Detecting Selection in Population Trees: The Lewontin and Krakauer Test Extended. *Genetics* (2010). doi:10.1534/genetics.110.117275
  10. Exposito-Alonso, M. *et al.* Genomic basis and evolutionary potential for extreme drought adaptation in *Arabidopsis thaliana*. *Nat Ecol Evol* **2**, 352–358 (2018).
  11. Bay, R. A. *et al.* Genomic signals of selection predict climate-driven population declines in a migratory bird. *Science* **359**, 83–86 (2018).
  12. Coop, G., Witonsky, D., Di Rienzo, A. & Pritchard, J. K. Using environmental correlations to identify loci underlying local adaptation. *Genetics* **185**, 1411–1423 (2010).
  13. Hancock, A. M. *et al.* Adaptation to climate across the *Arabidopsis thaliana* genome. *Science* **334**, 83–86 (2011).
  14. Lasky, J. R. *et al.* Characterizing genomic variation of *Arabidopsis thaliana*: the roles of geography and climate. *Mol. Ecol.* **21**, 5512–5529 (2012).
  15. Kingsolver, J. G. *et al.* The strength of phenotypic selection in natural populations. *Am. Nat.* **157**, 245–261 (2001).
- 280

- 281 16. Savolainen, O., Lascoux, M. & Merilä, J. Ecological genomics of local adaptation. *Nat. Rev. Genet.*  
282 **14**, 807–820 (2013).
- 283 17. Gompert, Z. *et al.* Experimental evidence for ecological selection on genome variation in the  
284 wild. *Ecol. Lett.* **17**, 369–379 (2014).
- 285 18. Anderson, J. T., Lee, C.-R. & Mitchell-Olds, T. Strong selection genome-wide enhances fitness  
286 trade-offs across environments and episodes of selection. *Evolution* **68**, 16–31 (2014).
- 287 19. Price, N. *et al.* Combining population genomics and fitness QTLs to identify the genetics of local  
288 adaptation in *Arabidopsis thaliana*. *Proc. Natl. Acad. Sci. U. S. A.* 201719998 (2018).  
289 doi:10.1073/pnas.1719998115
- 290 20. Exposito-Alonso, M. *et al.* A rainfall-manipulation experiment with 517 *Arabidopsis thaliana*  
291 accessions. *bioRxiv* (2017). doi:10.1101/186767
- 292 21. Hereford, J. A quantitative survey of local adaptation and fitness trade-offs. *Am. Nat.* **173**,  
293 579–588 (2009).
- 294 22. Leimu, R. & Fischer, M. A meta-analysis of local adaptation in plants. *PLoS One* **3**, e4010 (2008).
- 295 23. 1001 Genomes Consortium. 1,135 Genomes Reveal the Global Pattern of Polymorphism in  
296 *Arabidopsis thaliana*. *Cell* **166**, 481–491 (2016).
- 297 24. Kojima, K. & Lewontin, R. C. Evolutionary Significance of Linkage and Epistasis. in *Mathematical*  
298 *Topics in Population Genetics* 367–388 (Springer, Berlin, Heidelberg, 1970).  
299 doi:10.1007/978-3-642-46244-3\_12
- 300 25. Gompert, Z., Egan, S. P., Barrett, R. D. H., Feder, J. L. & Nosil, P. Multilocus approaches for the  
301 measurement of selection on correlated genetic loci. *Mol. Ecol.* **26**, 365–382 (2017).
- 302 26. Zhou, X. & Stephens, M. Efficient multivariate linear mixed model algorithms for genome-wide  
303 association studies. *Nat. Methods* **11**, 407–409 (2014).
- 304 27. Berg, J. J. & Coop, G. A Population Genetic Signal of Polygenic Adaptation. *PLoS Genet.* **10**,  
305 e1004412–e1004412 (2014).
- 306 28. Pritchard, J. K., Pickrell, J. K. & Coop, G. The genetics of human adaptation: hard sweeps, soft  
307 sweeps, and polygenic adaptation. *Curr. Biol.* **20**, R208–15 (2010).
- 308 29. Wittmann, M. J., Bergland, A. O., Feldman, M. W., Schmidt, P. S. & Petrov, D. A. Seasonally  
309 fluctuating selection can maintain polymorphism at many loci via segregation lift. *Proc. Natl.*  
310 *Acad. Sci. U. S. A.* **114**, E9932–E9941 (2017).
- 311 30. Haldane, J. B. S. The Cost of Natural Selection. *Genetics* **55**, 511–524 (1957).
- 312 31. Zhou, X., Carbonetto, P. & Stephens, M. Polygenic modeling with bayesian sparse linear mixed  
313 models. *PLoS Genet.* **9**, e1003264 (2013).
- 314 32. Lewontin, R. C. *The genetic basis of evolutionary change.* **560**, (Columbia University Press New  
315 York, 1974).
- 316 33. Charlesworth, B. The effects of deleterious mutations on evolution at linked sites. *Genetics* **190**,  
317 5–22 (2012).
- 318 34. DeGiorgio, M., Huber, C. D., Hubisz, M. J., Hellmann, I. & Nielsen, R. SweepFinder2: increased  
319 sensitivity, robustness and flexibility. *Bioinformatics* **32**, 1895–1897 (2016).
- 320 35. Hijmans, R. J., Cameron, S. E., Parra, J. L., Jones, P. G. & Jarvis, A. Very high resolution  
321 interpolated climate surfaces for global land areas. *Int. J. Climatol.* **25**, 1965–1978 (2005).
- 322 36. Fournier-Level, A. *et al.* A map of local adaptation in *Arabidopsis thaliana*. *Science* **334**, 86–89  
323 (2011).
- 324 37. Manzano-Piedras, E., Marcer, A., Alonso-Blanco, C. & Picó, F. X. Deciphering the adjustment  
325 between environment and life history in annuals: lessons from a geographically-explicit  
326 approach in *Arabidopsis thaliana*. *PLoS One* **9**, e87836–e87836 (2014).

- 327 38. Nosil, P. *et al.* Natural selection and the predictability of evolution in *Timema* stick insects.  
328 *Science* **359**, 765–770 (2018).
- 329 39. Abatzoglou, J. T., Dobrowski, S. Z., Parks, S. A. & Hegewisch, K. C. TerraClimate, a high-resolution  
330 global dataset of monthly climate and climatic water balance from 1958–2015. *Sci Data* **5**,  
331 170191 (2018).
- 332 40. Lee, C.-R. *et al.* On the post-glacial spread of human commensal *Arabidopsis thaliana*. *Nat.*  
333 *Commun.* **8**, 14458 (2017).
- 334 41. Levene, H. Genetic Equilibrium When More Than One Ecological Niche is Available. *Am. Nat.* **87**,  
335 331–333 (1953).
- 336 42. Henry, R. C., Bartoń, K. A. & Travis, J. M. J. Mutation accumulation and the formation of range  
337 limits. *Biol. Lett.* **11**, 20140871 (2015).
- 338 43. Lee-Yaw, J. A. *et al.* A synthesis of transplant experiments and ecological niche models suggests  
339 that range limits are often niche limits. *Ecol. Lett.* (2016). doi:10.1111/ele.12604
- 340 44. Stebbins, G. L. Aridity as a Stimulus to Plant Evolution. *Am. Nat.* **86**, 33–44 (1952).
- 341 45. Leffler, E. M. *et al.* Revisiting an old riddle: what determines genetic diversity levels within  
342 species? *PLoS Biol.* **10**, e1001388 (2012).
- 343 46. Giorgi, F., Bi, X. & Pal, J. Mean, interannual variability and trends in a regional climate change  
344 experiment over Europe. II: climate change scenarios (2071–2100). *Clim. Dyn.* **23**, 839–858  
345 (2004).
- 346 47. Samaniego, L. *et al.* Anthropogenic warming exacerbates European soil moisture droughts. *Nat.*  
347 *Clim. Chang.* **8**, 421–426 (2018).
- 348 48. Shakoob, N., Lee, S. & Mockler, T. C. High throughput phenotyping to accelerate crop breeding  
349 and monitoring of diseases in the field. *Curr. Opin. Plant Biol.* **38**, 184–192 (2017).
- 350 49. Asner, G. P., Nepstad, D., Cardinot, G. & Ray, D. Drought stress and carbon uptake in an Amazon  
351 forest measured with spaceborne imaging spectroscopy. *Proc. Natl. Acad. Sci. U. S. A.* **101**,  
352 6039–6044 (2004).

353 **Supplemental Information Guide for**  
354 Exposito-Alonso et al.: A map of climate change-driven  
355 natural selection in *Arabidopsis thaliana*

356 **Table of Content**

|     |                                                                                                                   |           |
|-----|-------------------------------------------------------------------------------------------------------------------|-----------|
| 357 | <b>REFERENCES</b>                                                                                                 | <b>11</b> |
| 358 | <b>SUPPLEMENTAL METHODS</b>                                                                                       | <b>16</b> |
| 359 | <b>I. Fitness data from: “A rainfall-manipulation experiment with 517 <i>Arabidopsis thaliana</i> accessions”</b> | <b>16</b> |
| 360 |                                                                                                                   |           |
| 361 | <b>II. 1001 Genomes Project data</b>                                                                              | <b>16</b> |
| 362 | <b>III. Fst and selective sweep signatures from polymorphism data</b>                                             | <b>16</b> |
| 363 | <b>III.1 Geographic proxies of diversity metrics</b>                                                              | <b>17</b> |
| 364 | <b>IV. Heritability of fitness</b>                                                                                | <b>17</b> |
| 365 | <b>V. Genome-Wide Association, selection differentials, and direct selection estimates</b>                        | <b>18</b> |
| 366 | <b>V.1 Trade-offs of selection</b>                                                                                | <b>19</b> |
| 367 | <b>V.1.1 Across field experiments</b>                                                                             | <b>19</b> |
| 368 | <b>V.1.1 Across life history stages</b>                                                                           | <b>19</b> |
| 369 | <b>V.2 Intensity of selection</b>                                                                                 | <b>19</b> |
| 370 | <b>V.3 Important notes on population structure correction in a wild species</b>                                   | <b>20</b> |
| 371 | <b>VI. Climate Genome-Wide Association</b>                                                                        | <b>20</b> |
| 372 | <b>VII. Climate and modeling</b>                                                                                  | <b>21</b> |
| 373 | <b>VII.1. Climate layers</b>                                                                                      | <b>21</b> |
| 374 | <b>VII.2. Environmental Niche Models</b>                                                                          | <b>21</b> |
| 375 | <b>VII.3. Climate variability</b>                                                                                 | <b>22</b> |
| 376 | <b>VIII. Predictions of selection differentials with summary statistics</b>                                       | <b>22</b> |
| 377 | <b>VIII.1 The model</b>                                                                                           | <b>22</b> |
| 378 | <b>VIII.2 A simple visualization of environmental distance</b>                                                    | <b>23</b> |
| 379 | <b>VIII.3 Note on limitations and interpretations</b>                                                             | <b>23</b> |
| 380 | <b>IX. Re-analysis of published data from common garden experiments</b>                                           | <b>24</b> |
| 381 | <b>IX.1 Manzano-Piedras et al. 2014</b>                                                                           | <b>24</b> |
| 382 | <b>IX.2 Fournier-Level et al. 2011</b>                                                                            | <b>24</b> |
| 383 | <b>IX.3 1001 Genomes x RegMap panel phenotype imputation</b>                                                      | <b>25</b> |
| 384 | <b>IX.4 Sanity checks for imputation and geographic predictions</b>                                               | <b>25</b> |
| 385 | <b>IX.5 An explanation for “inverse predictability”</b>                                                           | <b>26</b> |
| 386 | <b>SUPPLEMENTAL FIGURES</b>                                                                                       | <b>27</b> |
| 387 | <b>Figure S1. Accession locations</b>                                                                             | <b>27</b> |
| 388 | <b>Figure S2. Environment ranges</b>                                                                              | <b>28</b> |
| 389 | <b>Figure S3. Map of predicted environmental change</b>                                                           | <b>29</b> |
| 390 | <b>Figure S4. Genome maps of survival</b>                                                                         | <b>30</b> |

---

|     |                                                                                                      |           |
|-----|------------------------------------------------------------------------------------------------------|-----------|
| 391 | <b>Figure S5. Genome maps of fecundity</b>                                                           | <b>31</b> |
| 392 | <b>Figure S6. Trade-offs in survival and fecundity</b>                                               | <b>32</b> |
| 393 | <b>(Fig. S6 continued)</b>                                                                           | <b>33</b> |
| 394 | <b>Figure S7. Fst and empirical selection</b>                                                        | <b>34</b> |
| 395 | <b>(Fig. S7 continued)</b>                                                                           | <b>35</b> |
| 396 | <b>Figure S8. Sweeps and empirical selection</b>                                                     | <b>36</b> |
| 397 | <b>(Fig. S8 continued)</b>                                                                           | <b>37</b> |
| 398 | <b>As Fig. 2D, for all environments.</b>                                                             | <b>37</b> |
| 399 | <b>Figure S9. MAF and relative fitness</b>                                                           | <b>38</b> |
| 400 | <b>(Fig. S9 continued)</b>                                                                           | <b>39</b> |
| 401 | <b>Figure S10. Environmental distance and selection differentials</b>                                | <b>40</b> |
| 402 | <b>Figure S11. Future change in selection for different climate change scenarios</b>                 | <b>41</b> |
| 403 | <b>Figure S12. Field validation conceptual chart</b>                                                 | <b>42</b> |
| 404 | <b>Figure S13. Null expectation of predictability</b>                                                | <b>43</b> |
| 405 | <b>Figure S14. Change in selection relative to local diversity</b>                                   | <b>44</b> |
| 406 | <b>SUPPLEMENTAL TABLES &amp; DATASETS</b>                                                            | <b>45</b> |
| 407 | <b>Table S1. List of accessions</b>                                                                  | <b>45</b> |
| 408 | <b>Table S2. Summary of fitness data</b>                                                             | <b>45</b> |
| 409 | <b>Table S3. Heritability of traits</b>                                                              | <b>45</b> |
| 410 | <b>Table S4. Number of SNPs with significant selection differentials</b>                             | <b>45</b> |
| 411 | <b>Table S5. Expected allele frequency changes in response to selection</b>                          | <b>45</b> |
| 412 | <b>Table S6. Variable importance of predictive models</b>                                            | <b>45</b> |
| 413 | <b>Table S7. Predictability of environmental models</b>                                              | <b>46</b> |
| 414 | <b>Table S8. Description of climate variables</b>                                                    | <b>46</b> |
| 415 | <b>Table S9. GBLUP heritability and imputation accuracy of data from published field experiments</b> | <b>46</b> |
| 416 | <b>46</b>                                                                                            |           |
| 417 | <b>Table S10. Correlation between inferred natural selection intensity and other variables</b>       | <b>46</b> |
| 418 | <b>SUPPLEMENTAL REFERENCES</b>                                                                       | <b>47</b> |



## 419 SUPPLEMENTAL METHODS

### 420 I. Fitness data from: “A rainfall-manipulation experiment with 517 *Arabidopsis* 421 *thaliana* accessions”

422 The field experiment is described in detail in Exposito-Alonso et al. “A rainfall-manipulation  
423 experiment with 517 *Arabidopsis thaliana* accessions” (ref. 20). Data and processing code are  
424 available at <https://github.com/MoisesExpositoAlonso/dryAR> update doi: xxx. Information of the 517  
425 accessions can be found in [Table S1](#). The experiment resulted in observations from 23,154 pots.  
426 Three measurements of fitness were produced: survival from seed to reproductive adult (proportion  
427 0-1) and the average fecundity per reproductive adult (inflorescence skeleton lengths ranged from  
428 18,400 to 1,622,000 pixels, which approximately corresponds to 1 to 6,127 seeds per plant).  
429 Fecundity was only measured for plants with at least one fruit. We finally calculated an integrated  
430 lifetime fitness value by multiplying the survival proportion to adulthood with the total offspring  
431 produced. Data from only 515 accessions were used for subsequent analyses, because 2 accessions  
432 had insufficient genome information.

### 433 II. 1001 Genomes Project data

434 We used VCFtools v.0.1.12b (ref. 50) to subset and filter the 1001 Genomes VCFv4.1 (available at:  
435 <http://1001genomes.org/data/GMI-MPI/releases/v3.1/>). We used vcftools with the flags: --maf 0.01  
436 --max-alleles 2 --min-alleles 2 --max-missing 0.95. The resulting high-quality dataset was a genome  
437 matrix of 515 individuals by 1,353,386 variants for which we did not impute the small number of  
438 missing data points.

439 We annotated the 1001 Genomes VCF using the package SnpEff 4.3p (ref. 51). We then  
440 manually curated a set of eight categories of variants: intergenic, intron, UTR3, UTR5, exon,  
441 synonymous, nonsynonymous, exon noncoding.

### 442 III. $F_{st}$ and selective sweep signatures from polymorphism data

443 We used the genetic groups previously defined for the same accessions<sup>10</sup> and computed  $F_{ST}$  using  
444 PLINK version 1.9 (ref. 52). We also used PLINK to calculate  $\pi$  and Tajima’s D using PLINK in windows  
445 of 100 SNPs across the genome.

446 We used SweepFinder2 (ref. 34) to scan the genome for deviations of the Site Frequency  
447 Spectrum (SFS) that might be caused by selective sweeps. We used all 11,769,920 biallelic SNPs from  
448 the 1001 Genomes Project (without the filters of 1% MAF and maximum missing data of 5%, which  
449 were applied to generate the variants used in the GWA [see [section V](#)]).

### 450 III.1 Geographic proxies of diversity metrics

451 In order to estimate  $\pi$  and a proxy of Tajima's D at a regional scale, we used the 4 closest  
452 neighbouring accessions in our set (same patterns were observed with three neighbours within a  
453 geographic area of 5° latitude-longitude radius), and computed the total number of polymorphisms P  
454 in the subset and the sum of all pairwise Hamming differences, H. Then we calculated  $\theta$ ,  $\pi$  and D as:

$$\pi = \frac{H}{6 \times G} \frac{N_{full}}{N_{all}}$$
$$\theta = \frac{P}{1.8666 \times G} \frac{N_{full}}{N_{all}}$$
$$\hat{D} = \pi - \theta$$

455 Where  $G$  is the genome size,  $N_{full}$  are all SNPs with full information that were used to count  
456 polymorphisms and distances, and  $N_{all}$  are all SNPs of the genome matrix. In the denominators, 6 is  
457 the number of pairwise comparisons of four genomes, and 1.8666 is the harmonic number of 4.  
458 Although D is normally divided by the standard error, we only wanted to rank our natural lines so we  
459 used the difference between  $\pi$  and  $\theta$  as a proxy of D.

## 460 IV. Heritability of fitness

461 To estimate how much variance in fitness is related to the genotypes of the lines, we used  
462 generalized linear mixed models using the R package MCMCglmm (ref. <sup>53</sup>). We used fitness estimates  
463 per replicate and, apart from including the natural line ID, we controlled for block (growing tray)  
464 and position within the block (longitudinal, latitudinal, and the interaction). As this is a Bayesian  
465 approach, we used flat priors, we used 10,000 MCMC steps, a burnin of 10%, and confirmed that this  
466 was sufficient for convergence of the chain. For survival proportion we used a Binomial link, for  
467 number of seeds we used a Poisson link, and for the combined lifetime relative fitness we used a  
468 Gaussian link. The mode and 95% Highest Posterior Density of the posterior distribution of each  
469 random effect were extracted ([Table S3](#)).

## 470 V. Genome-Wide Association, selection differentials, and direct selection estimates

471 We used GEMMA (ref. 31) to run regular linear models (LM) of the form:

$$472 \quad y = \mu + \beta_i x_i + \epsilon;$$

473 which was repeated for every SNP in the genome. This provided us with allele effects on  
474 relative fitness per SNP. This is the selection differential  $s$  from populations genetics and evolutionary  
475 biology <sup>4</sup>, which estimates the difference in fitness between the genotypes carrying the alternative  
476 (1) or reference allele (0) in a haploid model:  $w_1 - w_0 = s$ . The correspondence with allele  
477 frequency change  $\Delta p$  is dependent on the variance in allele frequency in addition to  $s$ :  
478  $\Delta p = p(1 - p)s$ . Low frequency variants are “less often seen” by selection.

479 We also run in GEMMA a Bayesian Sparse Linear Mixed model (BSLMM), to more accurately  
480 pinpoint casual positions. This model accommodates both poly- and oligogenic architectures and by  
481 jointly fitting all SNPs ( $n=1,353,386$ ), it statistically corrects for LD arising from population structure  
482 and/or low recombination. It models two effect hyperparameters, a basal effect,  $\alpha$ , that captures the  
483 fact that many SNPs contribute to the phenotype, and an extra effect,  $\beta$ , that captures the stronger  
484 effect of only a subset of SNPs. An internal parameter measuring the probability of having another  
485 extra effect,  $\gamma$ , can be used to prioritize SNPs. In BSLMM the total effect of an allele is  $= \alpha + \gamma\beta$ .

$$486 \quad y = 1_n \mu + X\beta + X\alpha + \epsilon;$$

$$487 \quad \beta_i \sim \pi N(0, \sigma_a^2 \tau^{-1}) + (1 - \pi) \delta_0;$$

$$488 \quad \alpha_i \sim N(0, \sigma_b^2 / (p\tau));$$

$$489 \quad \epsilon \sim MVN_n(0, \tau^{-1} I_n).$$

490 The BSLMM model is also useful also used to calculate the proportion of variance explained  
491 (‘chip heritability’). To do this, we used the last 1,000 samples of the MCMC chain and calculated the  
492 95% Highest Posterior Density Interval (95% HPD), for which we report the median and the 2.5% and  
493 97.5% percentiles.

494 To illustrate the differences between a univariate (LM) and multivariate regressions (similar  
495 to BSLMM), we show an example of two SNP predictors,  $x_1$  and  $x_2$ . For mathematical convenience  
496 we assume that the response variable fitness,  $y$ , as well as the predictors, are mean centered and  
497 variance scaled. From the univariate approach, where the effect of a SNP is estimated marginally or  
498 independently,  $\beta$  would be:

$$\beta_{x_1} = \frac{\text{cov}(x_1, y)}{\text{var}(x_1)}$$

499 This would be estimated separately for SNP one and two. In a multivariate regression  
500 framework, the regression coefficient, called conditional or partial coefficient,  $\beta^*$ , is corrected by the  
501 correlation between the two predictors,  $r_{x_1x_2}$ , which in the case of genotypes is called linkage  
502 disequilibrium, as in the form of:

$$\beta_{x_1}^* = \frac{\beta_{x_1} - r_{x_1x_2} \times \beta_{x_2}}{\sqrt{(1 - \beta_{x_1}^2)(1 - \beta_{x_2}^2)}}$$

503 Thus we find an analogy between  $\beta$  and  $\beta^*$  and  $s$  and  $s^*$  from population genetics (eq. 4 from <sup>54</sup>  
504 simplified as conceptual model), where a selection differential is dependent on the true selection and  
505 an indirect term dependent on all other  $n$  SNPs in the genome.

## 506 V.1 Trade-offs of selection

### 507 V.1.1 Across field experiments

508 We looked for genetic variants with a positive selection differential in one experimental environment  
509 that had a negative differential in another (antagonistic pleiotropy). We also asked how often a  
510 selected variant in one environment was neutral in another environment (conditional neutrality).  
511 Only for the purpose of two-environment comparisons, to calculate the odds ratio, we considered  
512 SNPs whose selection differential  $P$ -value was lower than 0.01 in one environment as conditionally  
513 neutral, while antagonistic pleiotropy SNPs were ones whose  $P$ -values in both environments were <  
514 0.02 (because antagonistic pleiotropy requires two tests, one in each environment, the significance  
515 threshold should be 2 x  $P$ -value in each test) (see Fig. 2).

### 516 V.1.1 Across life history stages

517 Calculating allelic selection differentials for survival and fecundity separately, we found no correlation  
518 between survival-only and fecundity-only estimates ( $r < 0.07$ , [Fig. S4-6](#)), consistent with different  
519 stages of a plant being differentially affected by environmentally imposed selection<sup>55</sup>.

## 520 V.2 Intensity of selection

521 The distribution of absolute allelic selection differentials,  $|s|$ , has a shape resembling that of an  
522 exponential. We calculated the expected rate using Maximum Likelihood optimization in R, which can  
523 also be approximated as the inverse of the mean:

$$524 \hat{\lambda} = \frac{n}{\sum_{i=1}^n x_i}.$$

525 For this, we use  $\hat{\lambda}$  or the mean of  $|s|$  as a metric of the overall intensity of selection ([Fig. 1B](#),  
526 [Fig. 3D](#)).

### 527 **V.3 Important notes on population structure correction in a wild species**

528 The goal of genome-wide association studies in humans is the identification of individual SNPs that  
529 are causal for traits such as disease susceptibility. It is therefore imperative to penalize SNPs that are  
530 correlated with population structure, as the lack of controlled experiments can generate spurious  
531 associations between genetic variants more common in some human ancestry groups with regional  
532 measurement errors or different cultural and nutritional environments<sup>56</sup>. When a population  
533 includes multiple ancestries with different disease susceptibilities, population structure correction  
534 can obscure real signals, which has in turn led to the development of admixture mapping<sup>57</sup>. Similarly,  
535 in animal or plant breeding, SNPs conferring an advantageous trait but that are highly associated  
536 with a particular group of breeds or varieties (the equivalent of geographic populations) are also  
537 avoided, as selection of these SNPs can drag along undesirable traits from such parents<sup>58</sup>.

538 The situation is very different in a wild species such as *A. thaliana*. Deliberately ignoring  
539 selection over SNPs linked to natural population history would be inappropriate, as it is known that  
540 populations may have adapted to different climates as they migrated and became isolated, with  
541 causal SNPs therefore showing strong geographic patterns of distribution (see refs. <sup>10,40</sup>). This is of  
542 particular importance when mapping relative fitness, where the goal is to quantify the total selection  
543 over a genetic variant, as this includes both direct selection as well as experienced indirect selection  
544 from other causal variants that are in linkage disequilibrium.

## 545 **VI. Climate Genome-Wide Association**

546 Similarly to our GWA with relative fitness, we used each climate variable  $m$  (see [Section VII.1](#)) as  
547 response variable  $y_m$  in a LM model using GEMMA (ref. 31, see [Section V](#)):

$$548 \quad y_m = \mu + \beta_i x_i + \epsilon;$$

549 This  $\beta$  coefficient for SNP  $i$ , which reflects the correlation of the alternative allele's presence  
550 and a climate variable, was used later on in our predictive models ([Section VIII](#)). As this is a raw  
551 correlation between allele presence and climate variables, it will capture both past signatures of  
552 climate adaptation and historic population migration and differentiation.

## 553 VII. Climate and modeling

### 554 VII.1. Climate layers

555 We used the classic bioclim variables (n=19), plus monthly data of minimum and maximum  
556 temperature, and precipitation (n=12 x 3) ([worldclim.org](http://worldclim.org)). From these we estimated monthly  
557 evapotranspiration rates using the R package EcoHydRology v. 0.4.12 (ref. 59) and actual monthly  
558 evapotranspiration using a bucket model<sup>60</sup> (n=12 x 2). Based on ref. 14 we calculated whether *A.*  
559 *thaliana* can grow in a given month based on temperature and precipitation (n=12), and derived from  
560 this the length of the potential growing season (n=1). Over the potential growing season, we  
561 calculated minimum and maximum temperature, and total precipitation (n=3). Finally, using the  
562 mean and variance flowering time (=lifespan) across all our field experiments per accession, and  
563 based on their climate of origin using the above variables, we used an environmental niche model to  
564 generate a map surface of the most likely plant lifespan (n=2). This provides an estimate of the actual  
565 growing season, which we subtracted from the potential growing season to generate one more  
566 composite variable (n=1). Each variable is further described in [Table S6](#). A total of 98 raster layers are  
567 available as .gri/.grd files (native R format) from: [github.com/MoisesExpositoAlonso/araenv](https://github.com/MoisesExpositoAlonso/araenv), with  
568 [doi: update](#).

### 569 VII.2. Environmental Niche Models

570 Genome Environmental Niche Models (GEMs) were fit using decision trees with presence/absence of  
571 SNPs as response variable and the climate variables described in the previous section and latitude  
572 and longitude as predictors; as described<sup>10</sup>. To fit the models we used an Stochastic Gradient  
573 Boosting approach with the R package caret (ref. 61). The parameters used to fit the model were: 50  
574 decision trees, an interaction depth of 2, a shrinkage of 0.1, and a minimum of observations at end  
575 nodes of 10. This set of parameters was determined after running our GEMs for some exemplary  
576 SNPs and confirming that this set of parameters was typically optimal for reducing residual-mean  
577 squared error in a Repeated Cross-Validation approach.

578 We used these models to predict from raster maps of the climate layers a probability  
579 between 0 and 1 that the alternative allele was in a map cell. We judge this as a more appropriate  
580 output than a discrete 0/1 outcomes, as sometimes alleles were widespread or at intermediate  
581 frequencies in many regions and thus their environment niche was not strictly defined.

### 582 VII.3. Climate variability

583 To study spatial climate variability, for each Arabidopsis natural line, we extracted climate variables  
584 ([Table S8](#)) in a 50 Km buffer where they were originally collected from and calculated the coefficient  
585 of variation (CV) across grid cells.

586 To study temporal variability, we used climate data from 1958-2017<sup>39</sup> to calculate annual  
587 precipitation values for each population, from which we in turn derived the inter-annual CV..

## 588 VIII. Predictions of selection differentials with summary statistics

### 589 VIII.1 The model

590 We used a decision tree approach with Random Forest using the R package randomForest (ref. 62,63)  
591 to predict the vector (n=1,353,386) of GWA results with relative fitness in one environment, which  
592 we call allelic selection differentials  $s$ , from a 1,353,386 x 98 matrix of GWA associations with climate  
593 variables,  $\beta_{clim}$  ([Table S8](#), see [section VII](#)). We also included as predictors a 1,353,386 x 5 matrix  $\mu$  of  
594 genetic diversity and frequency metrics: minimum allele frequency,  $\pi$  diversity, Tajima's D, selective  
595 sweep likelihood ratio, and selective sweep alpha value (see [section III](#)). In addition, we included as  
596 predictors a 1,353,386 x 8 matrix  $\theta$  of non mutually exclusive variables taking values of 0 or 1  
597 indicating genomic annotations: intergenic, intron, UTR3, UTR5, exon, synonymous, nonsynonymous,  
598 exon noncoding (see [section II](#)). A total of 112 variables were thus used as predictors:  
599  $s = f(\beta_{clim}, \mu, \theta)$ . In the cases where we trained models with two environments, we also included  
600 the 2 x 98  $x_{clim}$  climate variables at our field stations:  $s = f(x_{clim}, \beta_{clim}, \mu, \theta)$ .

601 Because training a Random Forest with the full dataset would be computationally expensive,  
602 we only trained with 10,000 observations (with smaller and larger SNP sets, we had determined that  
603 training with more than 10,000 observations did not improve predictions). To test accuracy and bias  
604 we used a different set of 10,000 SNPs, divided into 100 bootstrap samples, and we report the  
605 intervals of the 95% bootstrap distribution. The results presented in Fig. 3 were produced with  
606 10,000 randomly drawn SNPs across the genome. To confirm that there was no confounding from  
607 non-independent samples in the training and testing SNPs, we repeated all analyses, training with  
608 10,000 random SNPs from chromosome 1 and testing with 10,000 random SNPs from the four other  
609 chromosomes. There were no substantial changes in predictability.

610 Several combinations of training and testing were performed to validate the predictions of  
611 "unobserved" environments. We did four model fittings, each time using training observations from  
612 three environments only, and then used observations from a fourth environment for testing. The  
613 final model, used for production maps, was trained with observations of four experiments and tested  
614 with the same four environments, but different observations.

615

## VIII.2 A simple visualization of environmental distance

616 To visualize more directly the relationship between allelic selection differentials at a location and the  
617 overall environment where the alleles are found, we calculated the distances between the field  
618 station's climate and the allele's home environment (as defined below). We started using the  
619 locations of the 515 data points and the genome matrix (515 individuals, 1,353,386 SNPs). This  
620 matrix is called  $X$  and the  $x_{ji}$  represent the genotype, 0 for reference and 1 for alternative, for the  
621  $j$  individual and  $i$  SNP. For all 515 locations we extract 19 climate variables available from raster  
622 databases ([worldclim.org](http://worldclim.org)), resulting in a 515 x 19 matrix  $E$ . Then we computed the mean of  
623 environments at locations where there are alternative SNPs:  $(E^T X) / X^T X$ ; this would reflect the  
624 alleles' "home environment". Instead of calculating the distance  $d_j$  in a single dimension between  
625 the field station and the natural population  $j$ , we computed the Euclidean distance of the 19 bioclim

626

means (variance and mean scaled) or a subset of them as:  $\sqrt{\sum_{i=1}^{19} d_j^2}$ . The same approach can be used

627 to calculate the distance to the optimal environment of the species. One could assume that the  
628 density of geographic locations where *A. thaliana* has been sampled would be the "realized  
629 optimum".

630

## VIII.3 Note on limitations and interpretations

631 As in any predictive exercise, our projections have limitations (discussed below). We nevertheless  
632 firmly believe that they are indispensable to move forward in the field of forecasting climate impacts.  
633 Models such as ours are tremendously useful for subsequent experimental validation (as we are  
634 currently doing through an experimental evolution network: [GrENE-net.org](http://GrENE-net.org)) or with *in situ*  
635 observations collected as we move into the future (e.g. [iNaturalist.org](http://iNaturalist.org), [iSpot.org](http://iSpot.org)). This iterative  
636 prediction  $\leftrightarrow$  validation process will be key to advancing the complex field of predicting the effects  
637 of climate change on biodiversity.

638 The limitations, enumerated and discussed:

639 A. Selection is a "relative force". The selection of a genetic variant depends on what other  
640 alternative genetic variants are in the population and at what frequency they are. Thus, the  
641 exact allelic selection differentials we observed are contingent on the accessions studied. For  
642 example, if in another GWA panel, a specific site is not variable, one could not calculate an  
643 allelic selection differential for that site. It is therefore important to carefully select a set of



644 accessions that represents geographic and genetic diversity of the species<sup>20</sup>. This is what we  
645 have done, and our selection estimates should thus be informative of relative trends of the  
646 species.

647 B. Even with an equally diverse GWA panel, if outcrossing and recombination was more  
648 common, the co-occurrence of two mutations would be different. This would then change  
649 allelic selection differentials, as a large amount of selection is driven by linkage  
650 disequilibrium in *A. thaliana* where outcrossing is rare (species selfing rate average=97%<sup>64</sup>).

651 C. Short-term selection differentials (over ecological times) do not necessarily reflect long-term  
652 selection coefficients (i.e. over evolutionary times).

653 D. Demographic dynamics are ultimately determined both by natural selection and stochastic  
654 demographic forces. Therefore, the knowledge of selection coefficients is necessary but not  
655 sufficient to determine the fate of a population.

656 E. Bet-hedging strategies such as seedbank demographic dynamics buffer allele frequency  
657 changes over time.

## 658 **IX. Re-analysis of published data from common garden experiments**

659 For a conceptual diagram of predictability validation with external common garden datasets, see [Fig.](#)  
660 [S12](#)

### 661 **IX.1 Manzano-Piedras et al. 2014**

662 Manzano-Piedras and colleagues<sup>37</sup> planted exactly 60 seeds per line in pots. They monitored how  
663 many plants established at the rosette stage and later on became reproductive adults (survival  
664 proportion). From these, they counted the number of fruits per pot and divided them by the number  
665 of reproductive adults (reproduction, seed set). We computed lifetime fitness as the product of  
666 survival and reproduction.

### 667 **IX.2 Fournier-Level et al. 2011**

668 Fournier-Level and colleagues<sup>36</sup> germinated seeds in greenhouses, and two weeks after germination  
669 (established seedling stage), they transplanted seedlings to outdoor field stations where one plant  
670 was transplanted in one pot. They counted how many transplanted seedlings survived to  
671 reproduction (partial survival proportion), and the number of fruits per plant (reproduction, seed  
672 set). We again computed lifetime fitness as the product of partial survival and reproduction.

673 We excluded the experiment in Finland in downstream analyses because only 58 natural  
674 lines were planted there in the original publication<sup>36</sup> and because later we verified the imputation  
675 accuracy was very low (Pearson's  $r < 0.008$ ).

### 676 **IX.3 1001 Genomes x RegMap panel phenotype imputation**

677 The 1001 Genomes panel (<http://1001genomes.org/>, ref. 23) includes 1,135 natural lines with  
678 11,769,222 biallelic SNPs from Illumina sequencing. The RegMap panel with 250  
679 (<http://arabidopsis.gmi.oeaw.ac.at:5000/DisplayResults>, ref. 8) included 1,307 natural lines with  
680 214,051 biallelic SNPs from array hybridization. The two populations shared 413 lines. Of these, 185  
681 were shared with the 515 lines used in the field experiments.

682 Of the 157 accessions of Fournier-Level et al., all were part of the RegMap panel, 89 were  
683 part of the 1001 Genomes, and 50 overlapped with our lines. Of the 279 accessions of  
684 Manzano-Piedras et al., 150 were part of the 1001 Genomes, and 131 overlapped with our field lines.

685 Because fitness is heritable, we tried to impute missing data based on the overall genomic  
686 relationships among all of the 2,029 natural lines belonging to 1001 Genomes and RegMap panels.  
687 After downloading and transforming the RegMap dataset to PLINK format, we overlapped  
688 genome-wide SNPs and filtered them for a genotyping rate of 95%, which yielded 154,090 biallelic  
689 SNPs. Given the linkage disequilibrium and genome size of *A. thaliana*, this easily suffices for  
690 generating a relationship matrix  $A$ , which we computed using the R package rrBLUP (ref. 65). The  
691 data of survival, reproduction, and lifetime fitness was an average per genotype, so we fit a classic  
692 GBLUP:  $y = Zg + \epsilon$ ; where  $y$  is the fitness trait of interest,  $Z$  is a design matrix of genotypes and  $g$   
693 is a random effect factor with covariance matrix equal to the relationship matrix  $g \sim MVN(0, A\sigma_g^2)$   
694 . Heritability of traits and imputation accuracy from the Manzano et al. and Fournier-Level  
695 experiments is given in [Table S9](#).

### 696 **IX.4 Sanity checks for imputation and geographic predictions**

697 We carried out sanity checks to ensure that the imputed fitness from other experiments was not just  
698 an artifactual phenotype with the same structure as the relationship matrix. This would mislead us to  
699 think there is predictability, as we would expect that allele selection differentials calculated in such  
700 artifactual phenotype would depend on population structure and thus would likely be predictable  
701 from climate structure alone.

702 We shuffled the genotype identities from Fournier-Level et al. and Manzano-Piedras et al.  
703 with their fitness values. Then we repeated the GBLUP analysis with 50 rounds of shuffling and  
704 computed heritabilities and prediction accuracies. We confirmed that heritability with shuffled data

705 was negligible ( $1 \times 10^{-9} < h^2 < 1.6^{-3}$ ) and so was the accuracy of imputation ( $-0.047310 < r < 0.070380$ ).  
706 This indicated that in the absence of true heritable variation, imputation of fitness would be random  
707 and not dependent on the relationship matrix.

708 We also were concerned that geographic predictions could be driven by some underlying  
709 bias in our analyses, i.e. bias inherent to geographic sampling, population history of genotypes  
710 chosen, etc. In other words, we were concerned that the null expectation of predictability would be  
711 non-zero. As before, we randomized fitness values with genotypes for all six datasets. Then, we  
712 repeated the GWA to estimate allelic selection differentials (as Fig. 1), and trained different  
713 combinations of GWES models to re-predict allelic selection differentials at each location based on  
714 climate (as Fig. 3). We confirmed that, differently from the analyses of real data presented in Fig. 3,  
715 there was no significant predictability ([Fig. S15](#)).

## 716 IX.5 An explanation for “inverse predictability”

717 We noticed that using only our two experiments for model training, there was “inverse  
718 predictability” for the three experiments from ref. 36. While the sign of inferred selection  
719 differentials was the opposite of the observed values ( $-0.33 < r < -0.51$ ,  $P < 0.001$ ), the magnitude of  
720 selection was correctly inferred ( $15\% < R^2 < 25\%$ , Fig. 3A). Such a phenomenon could arise for several  
721 reasons. First, the [worldclim.org](http://worldclim.org) climate averages (1960-1990) at 2.5 arc-minutes resolution might  
722 strongly deviate from the truly experienced environmental conditions in the years the experiments  
723 were conducted. Such climate variability can exert opposite selection in different years<sup>66</sup>. Second,  
724 differences in experimental design could lead to different lifetime fitness estimates. In ref. 36, early  
725 survival of seedlings was not measured at all, as only seedlings that had survived for two weeks in  
726 the greenhouse were transplanted into the field. In the Southern Spain experiment<sup>37</sup>, seeds were  
727 sown directly in the field, as in our own experiments, and accordingly, we had “positive  
728 predictability” ( $r = 0.24$ , Bootstrap CI = 0.09–0.41). In further support of this experimental design  
729 confounder, when we trained GWES models with only reproduction-based allele selection  
730 differentials in our experiment in Southern Germany, i.e., excluding early survival from lifetime  
731 fitness, we correctly predicted the sign of selection differentials in Fournier’s Northern Germany  
732 experiment ( $r = 0.392$ , Bootstrap CI = 0.20–0.57) (for null expectations see [Supplemental Methods](#)  
733 [IX.4](#)). The differences in predictions between two- and six-environment-trained models did not yield  
734 differences in downstream analyses and conclusions (correlation between predictions,  $r = 0.56$ ,  
735  $P < 10^{-16}$ ), but predictability increased with the number of experiments included in the training set ( $r =$   
736  $0.761$ , Bootstrap CI = 0.55–0.90,  $R^2 = 0.517$ , Fig. 3A).

737 **SUPPLEMENTAL FIGURES**

738 **Figure S1. Accession locations**

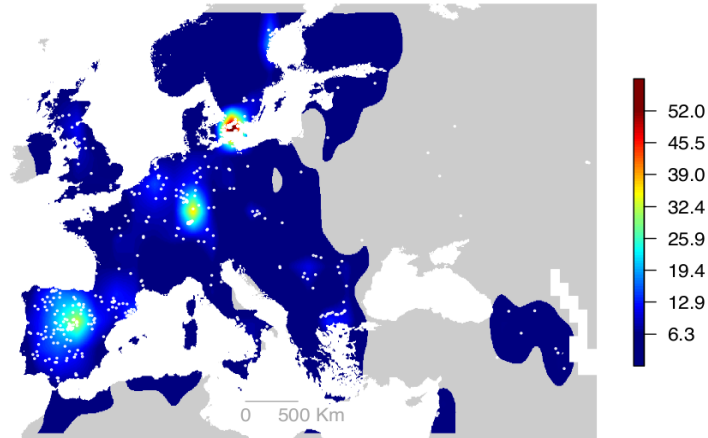

739 Points indicate the locations where the 517 *A. thaliana* accessions were collected. The color gradient  
740 is the density of samples from our study in squares of approximately 200 km x 200 km. The limits of  
741 the colored area were determined using a combined density grid from [gbif.org](http://gbif.org) and [1001 Genomes](http://1001Genomes)  
742 records. The density was generated in a grid of 125 min resolution and by applying a bilinear and  
743 then Gaussian smoothing. The threshold was chosen to be the 50% of the upper distribution, which  
744 roughly corresponds to 10 records per 200 km x 200 km square. Regions outside the colored were  
745 excluded from future climate change predictions, as we prefer to make predictions only in regions  
746 where the presence of *A. thaliana* is rather likely and continuous (Fig. 1).

747 **Figure S2. Environment ranges**

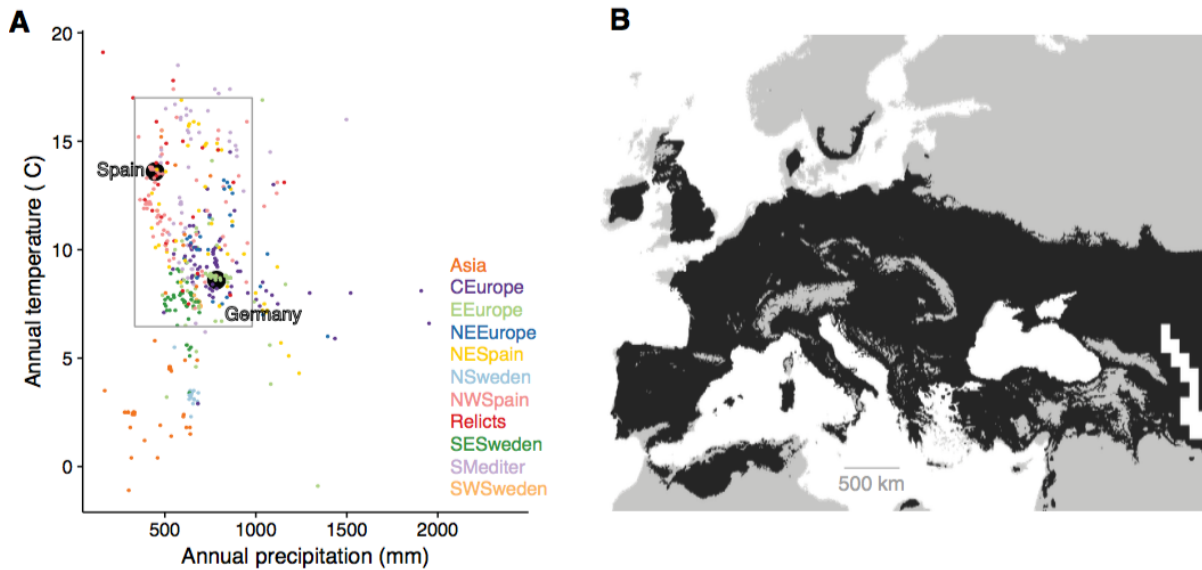

748 **(A)** Classic biplot of precipitation vs. temperature of origin of accessions (black dots) and field  
749 experiment of Spain (sepia) and Germany (green). Grey box indicates locations where precipitation  
750 was at least 70% of Spain and no more than 130% of Germany, and where temperature was no less  
751 than 70% of Germany and no more than 130% of Spain. **(B)** Areas that would be within the grey box  
752 in (A). Compare to Fig. S1.

753 **Figure S3. Map of predicted environmental change**

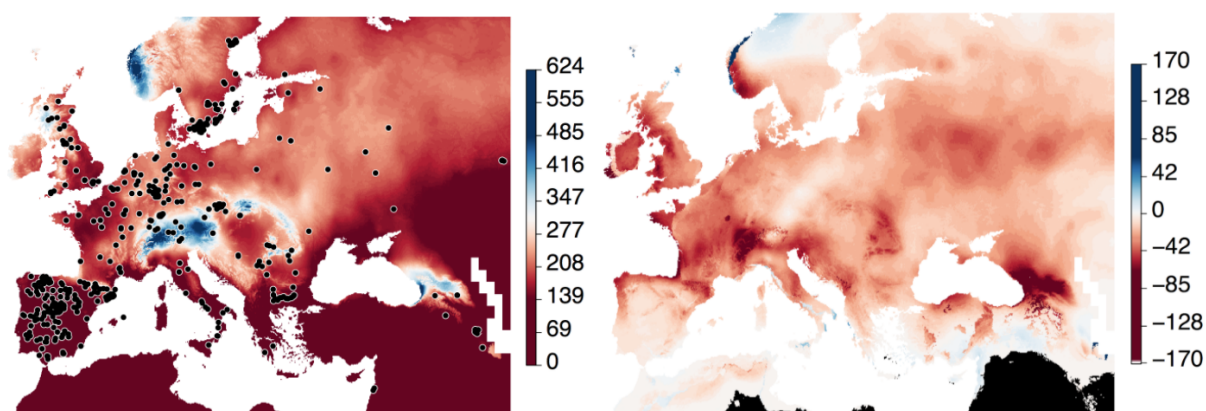

754 Precipitation during the warmest quarter (bio18, left), and its change predicted for 2070 (rcp 8.5)  
755 (right). Black areas indicate regions where precipitation will be lower than any area where *A. thaliana*  
756 has been currently sampled (black dots, left).

757 **Figure S4. Genome maps of survival**

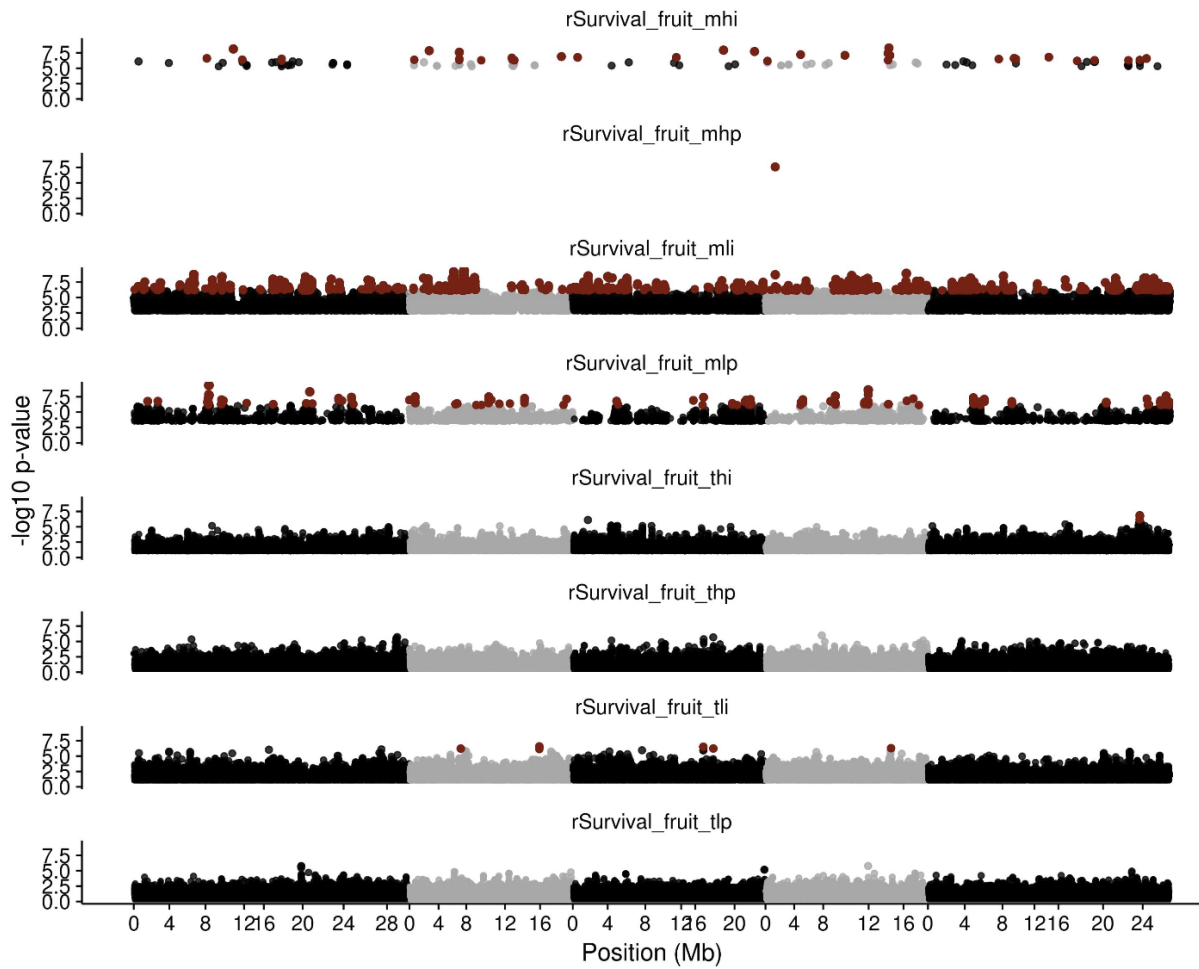

758 Same as Fig. 1, but only using the survival component of fitness.

759 **Figure S5. Genome maps of fecundity**

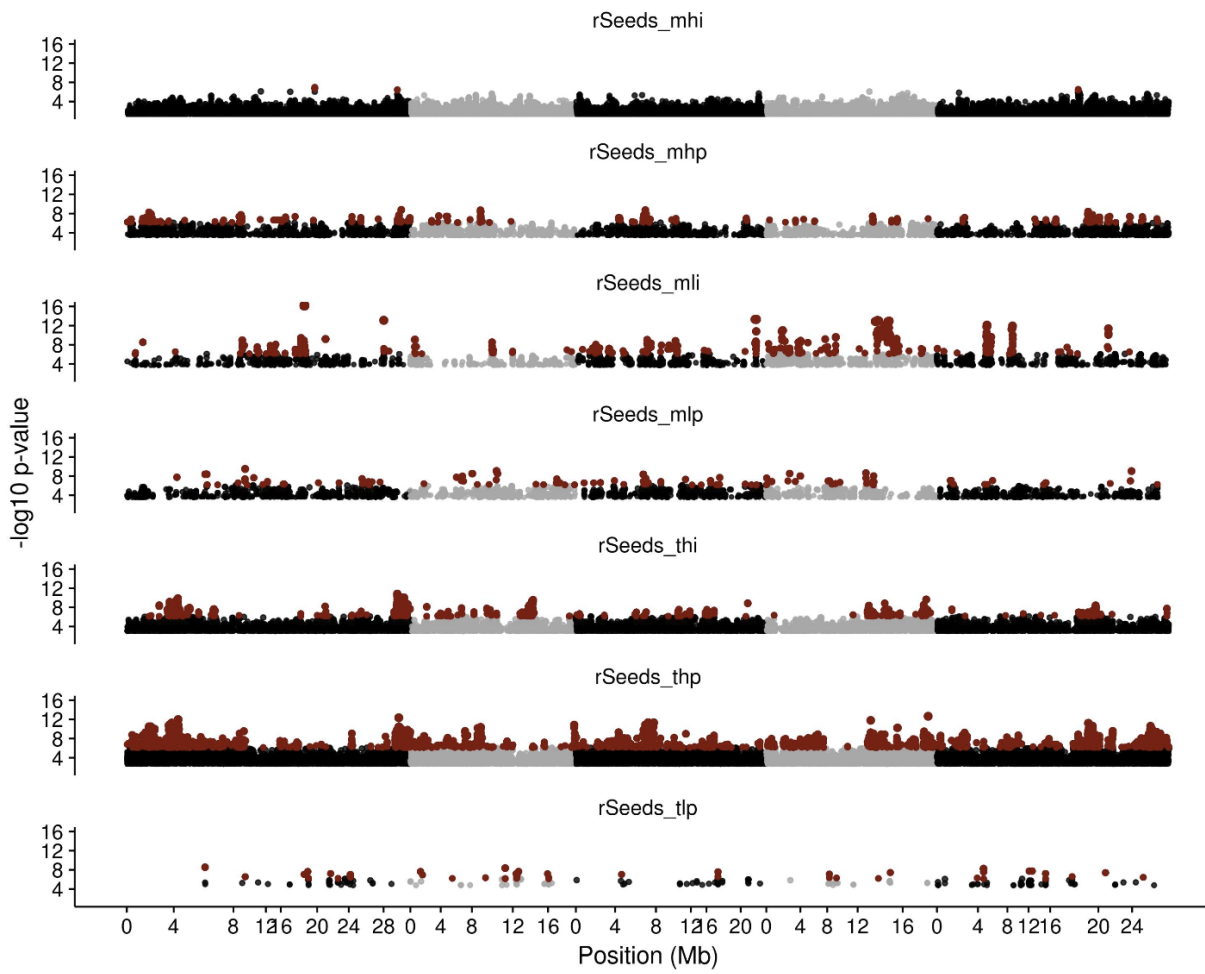

760 Same as Fig. 1, but only using the fecundity component of fitness.



761 **Figure S6. Trade-offs in survival and fecundity**

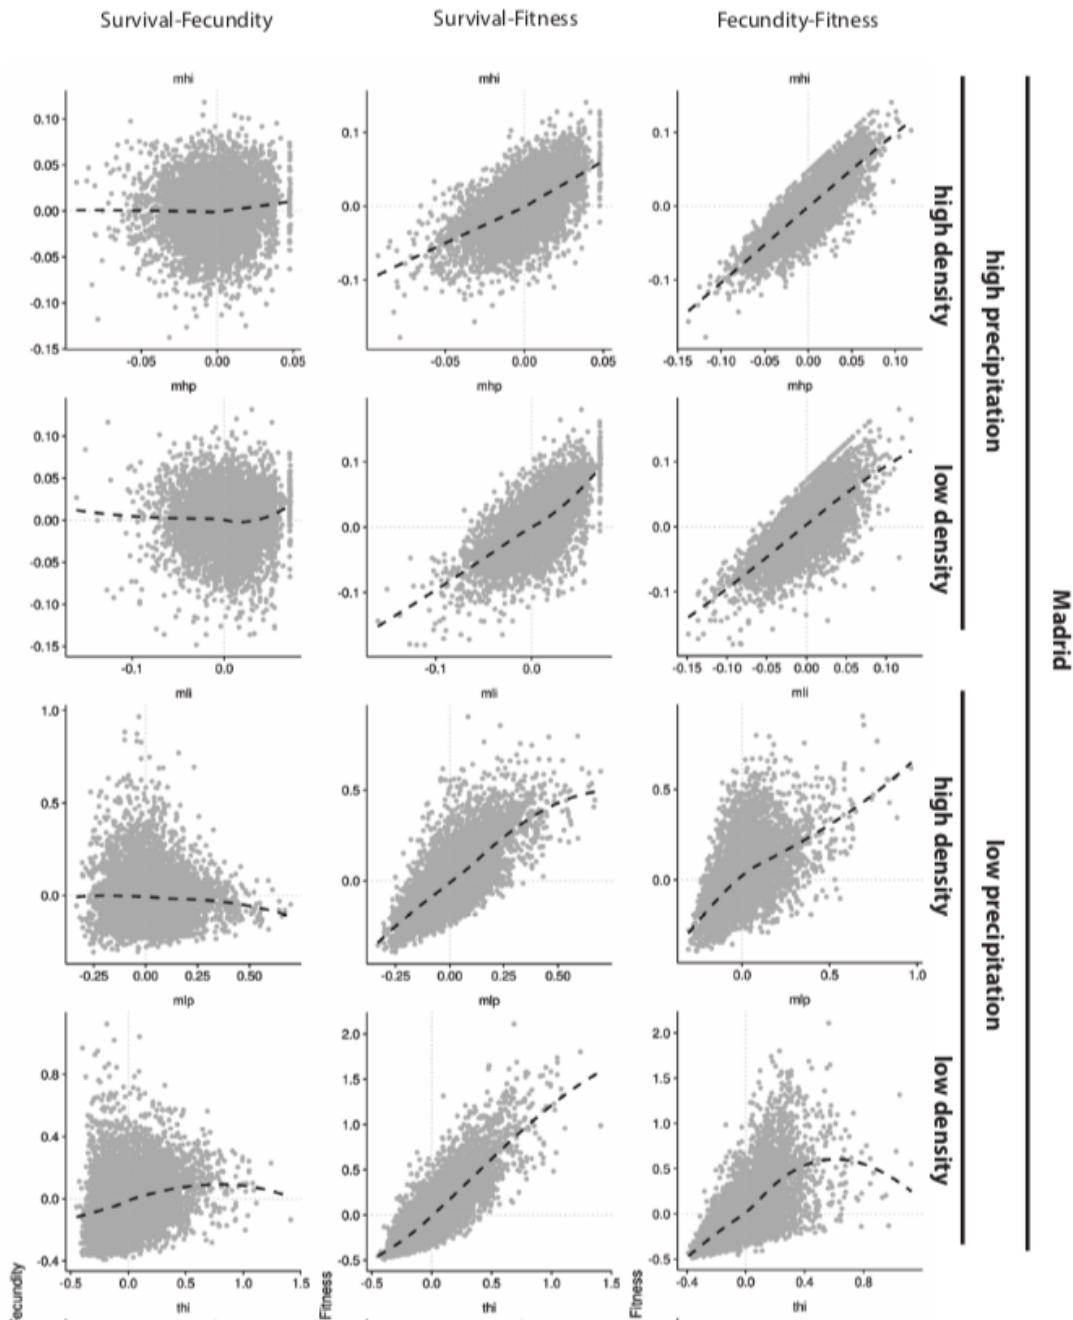

762 (Fig. S6 continued)

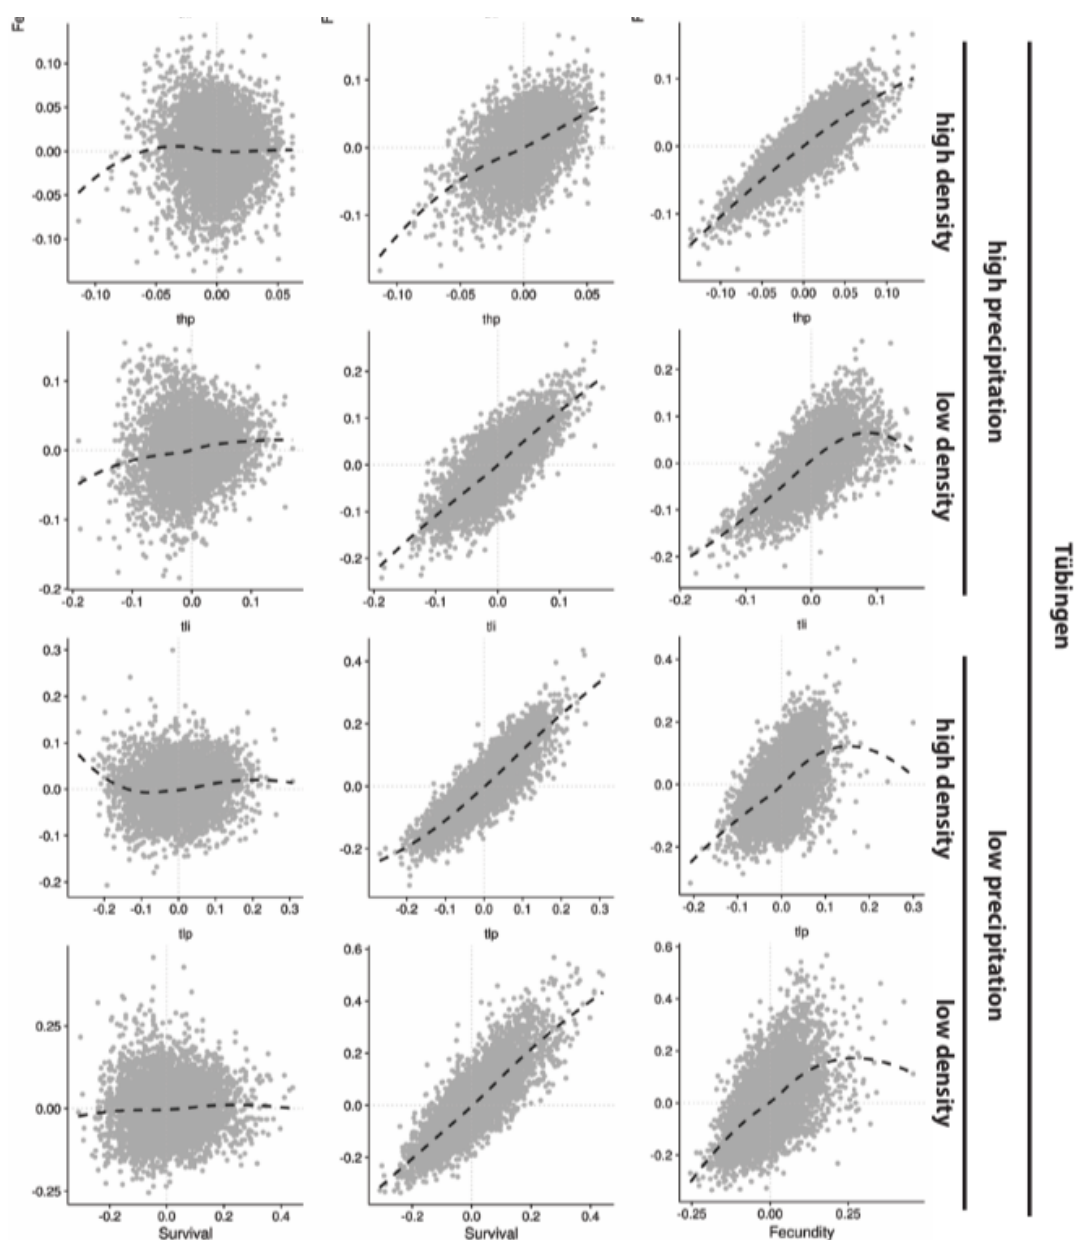

763 Comparisons of allele selection differentials computed only with the survival component, only with  
764 the fecundity component, and with both.

765 **Figure S7.  $F_{st}$  and empirical selection**

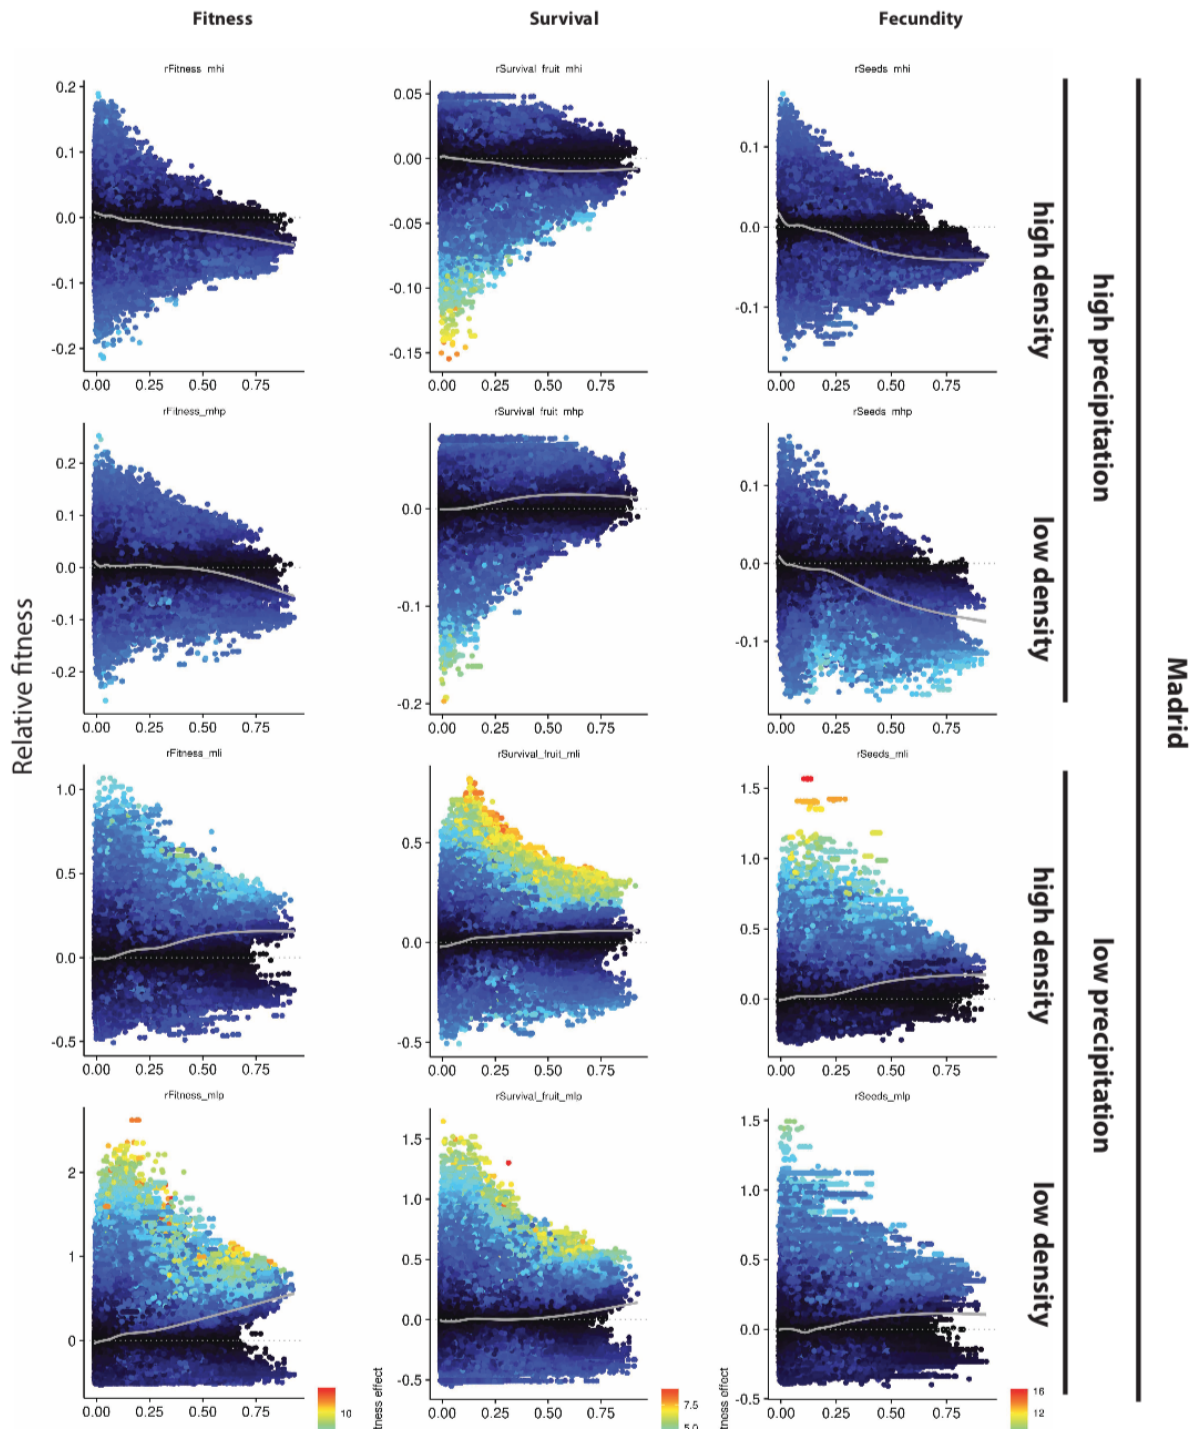

766 (Fig. S7 continued)

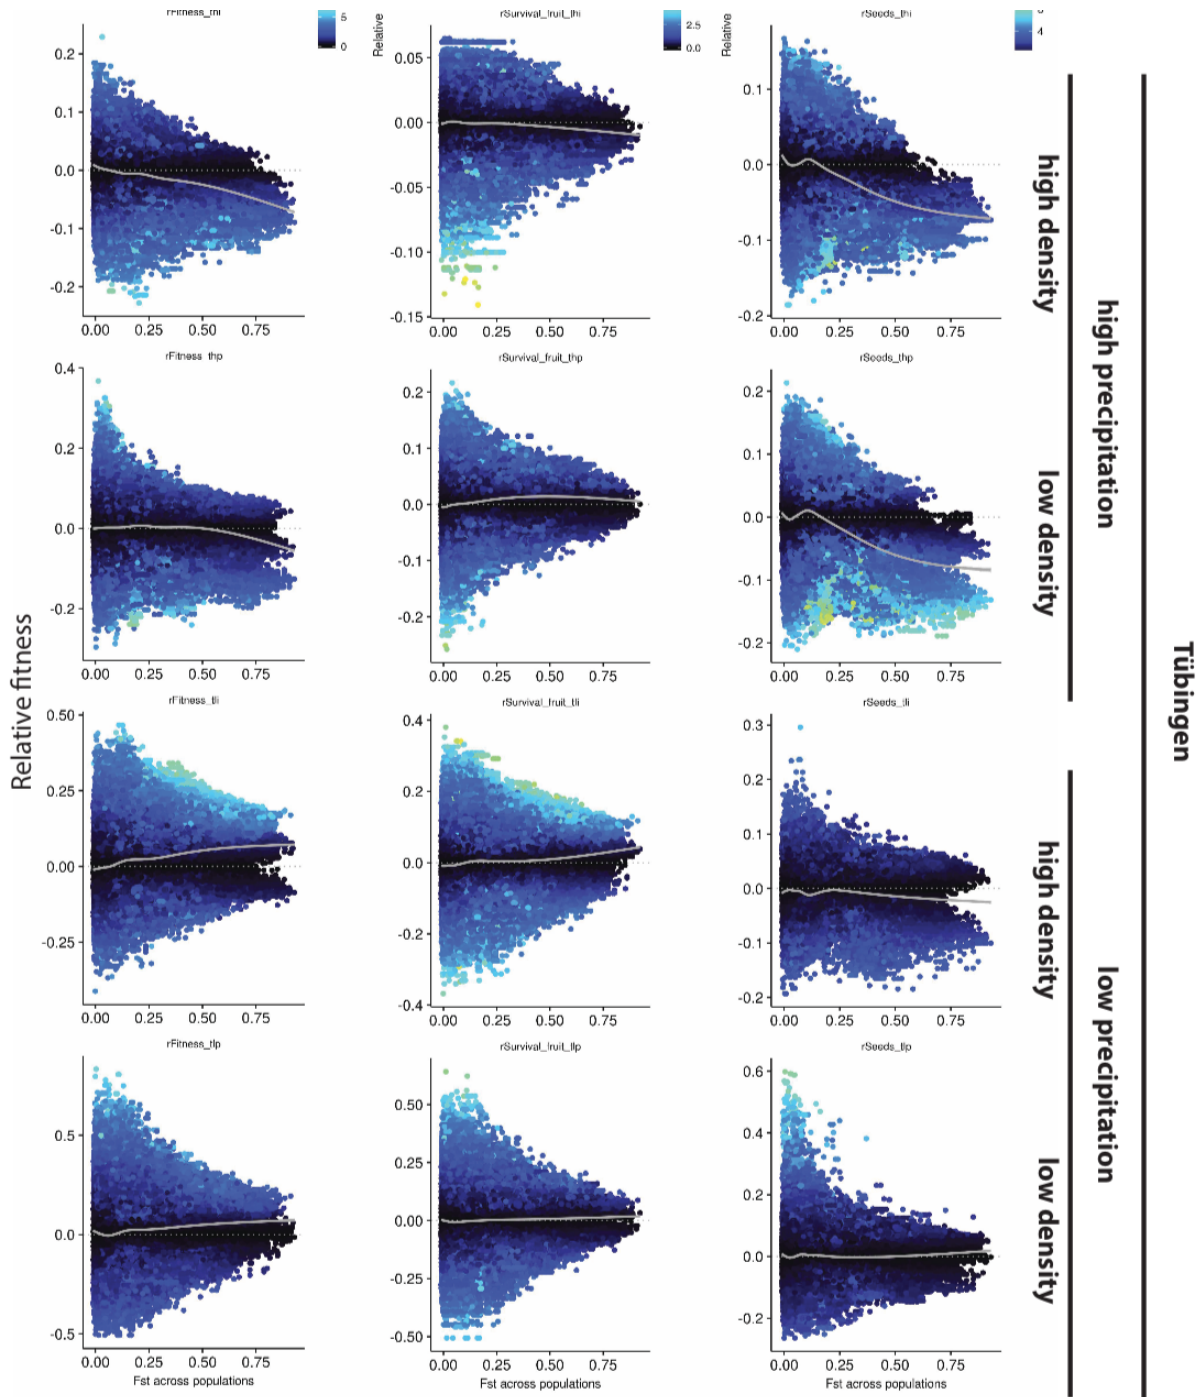

767 As Fig. 2C, for all environments.

768 **Figure S8. Sweeps and empirical selection**

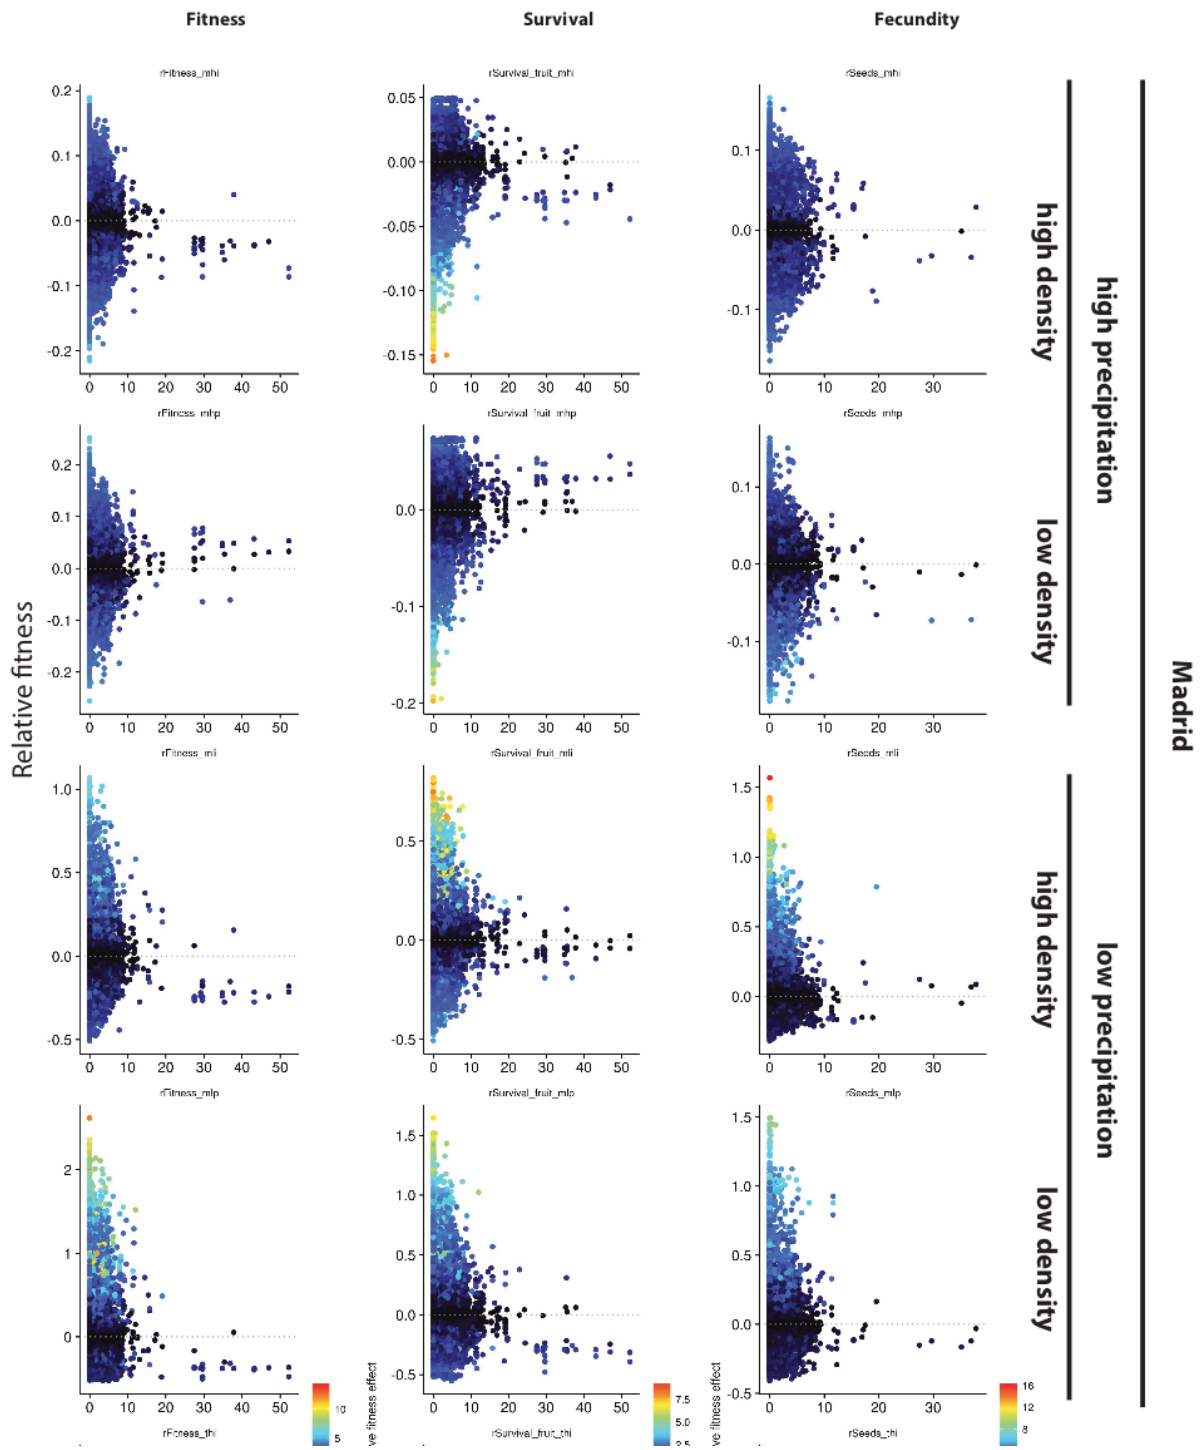

769 (Fig. S8 continued)

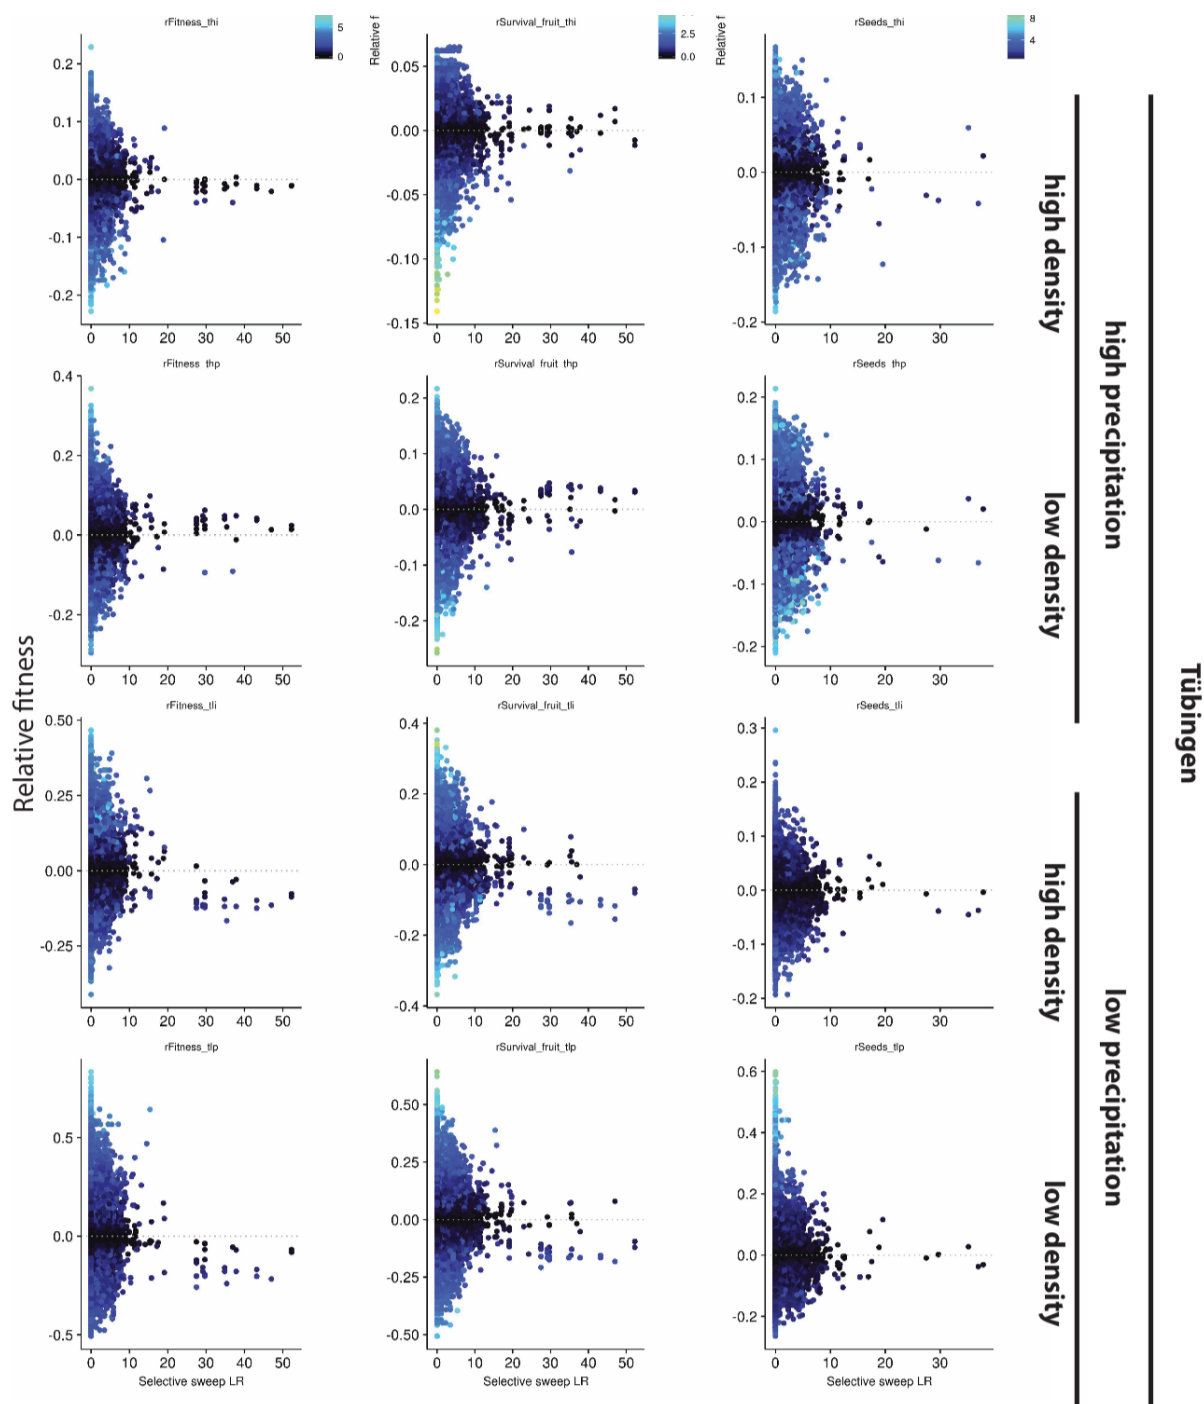

770 As Fig. 2D, for all environments.

771 **Figure S9. MAF and relative fitness**

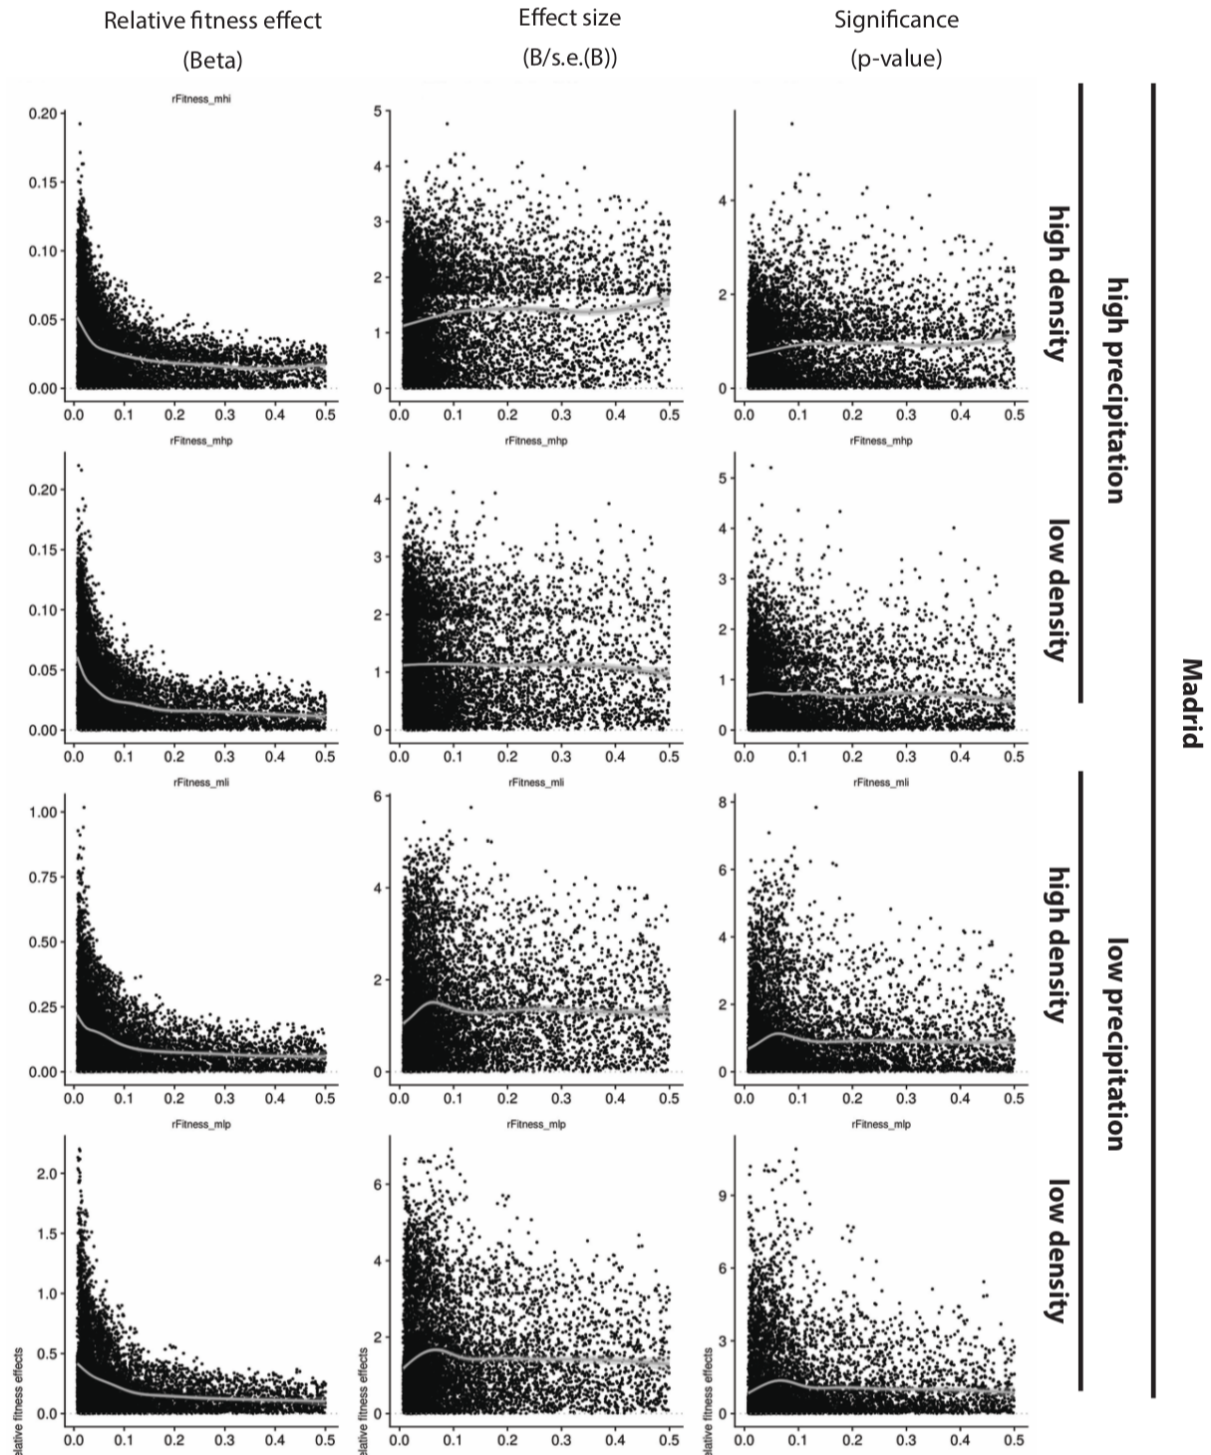

772 (Fig. S9 continued)

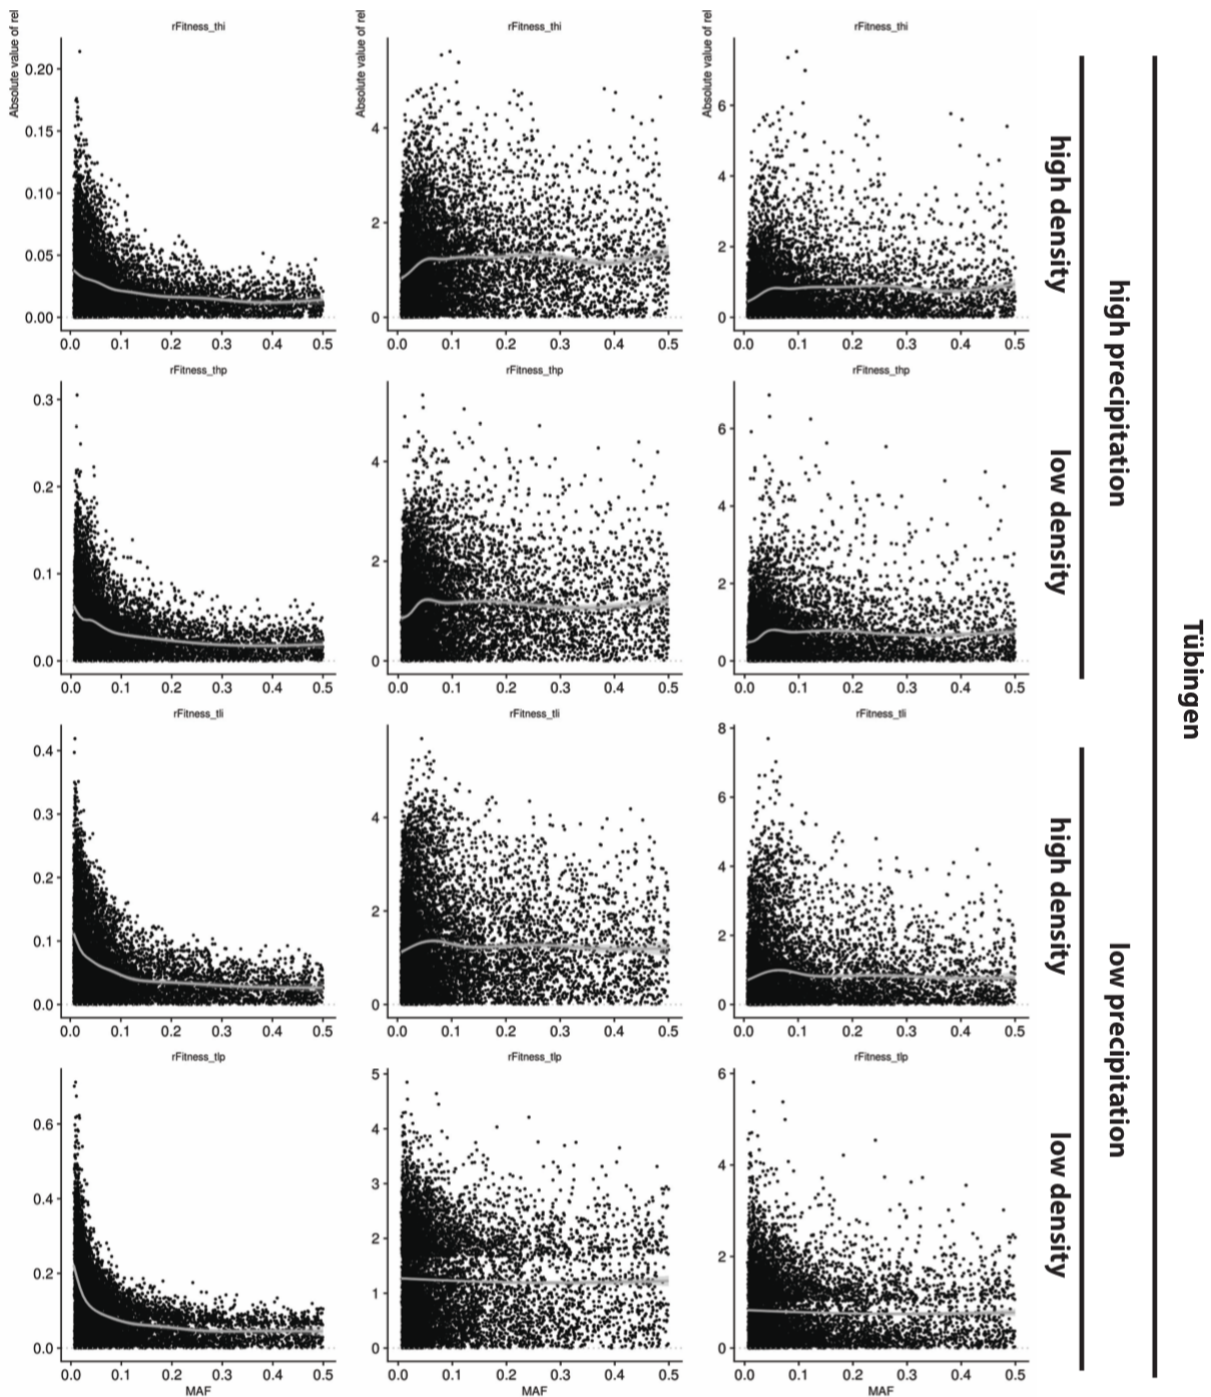

773 Relationships between relative fitness effect, relative fitness effect size, and  $P$ -values (calculated from  
774 GWA with relative fitness) and minor allele frequency of alleles in each environment.



775 **Figure S10. Environmental distance and selection differentials**

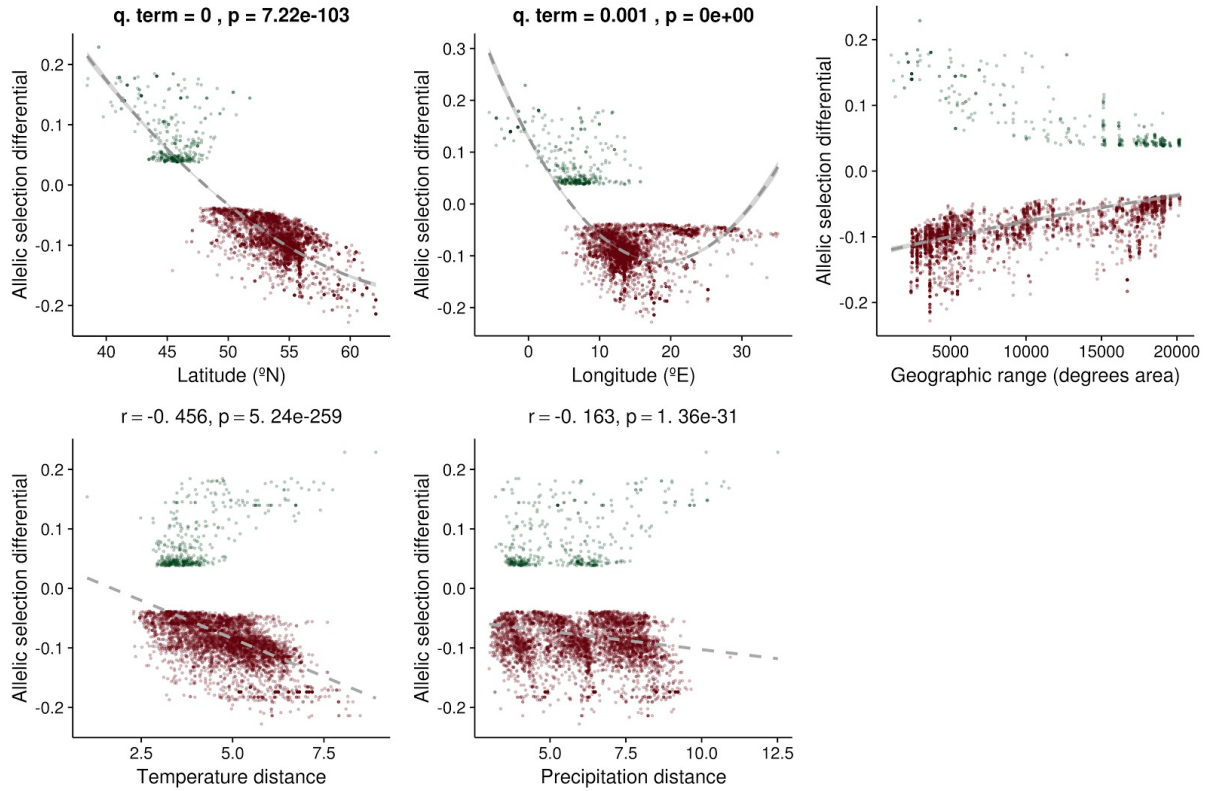

776 As Fig. 2B, but for allele selection differentials in Germany under high precipitation.

777 **Figure S11. Future change in selection for different climate change scenarios**

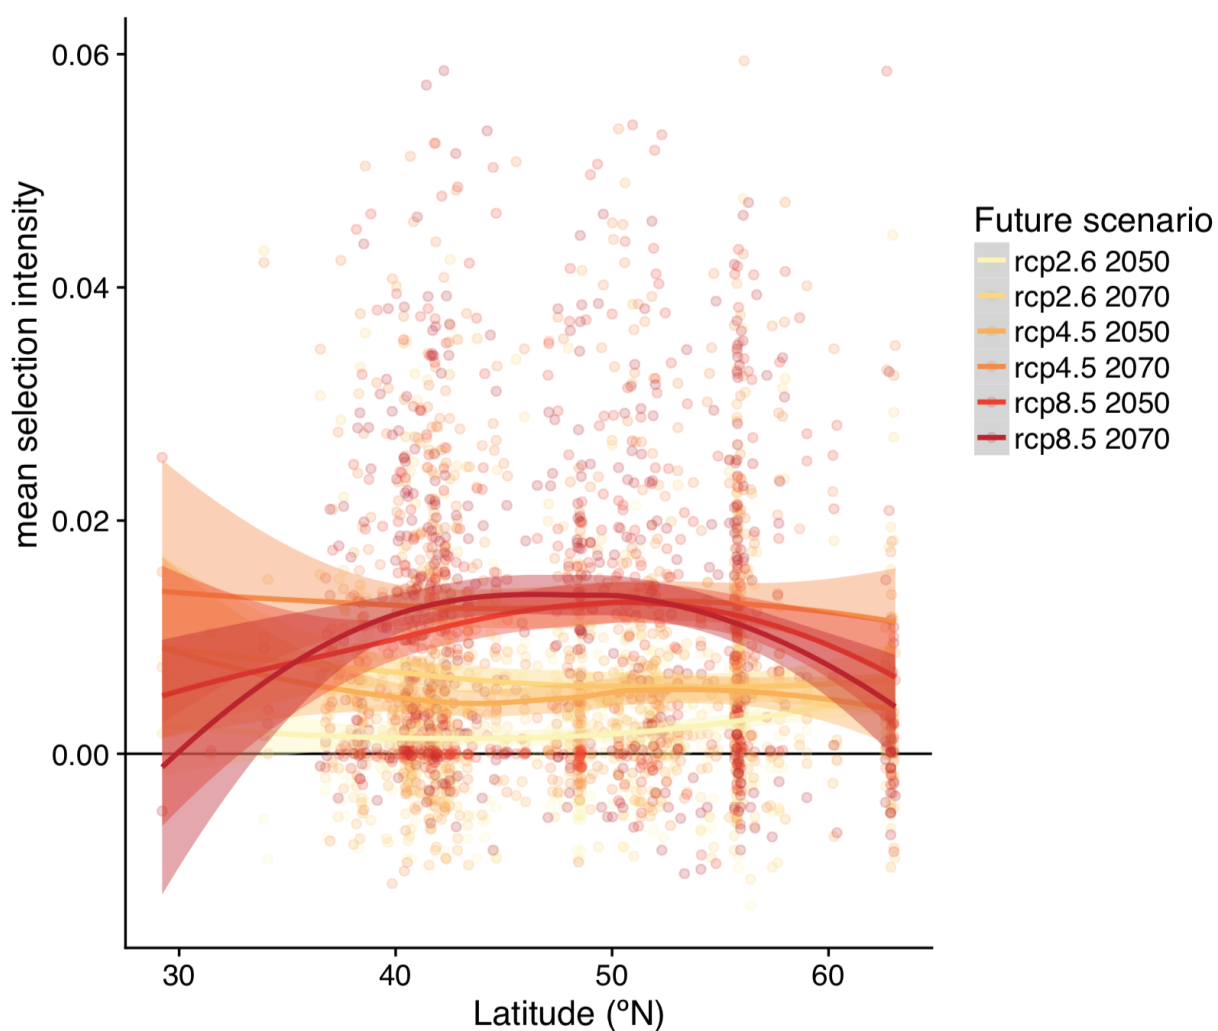

778 Same as Fig. 3G, but for different climate change scenarios. The higher the predicted CO<sub>2</sub> emissions,  
779 the stronger the predicted increase in selection intensity.

780 **Figure S12. Field validation conceptual chart**

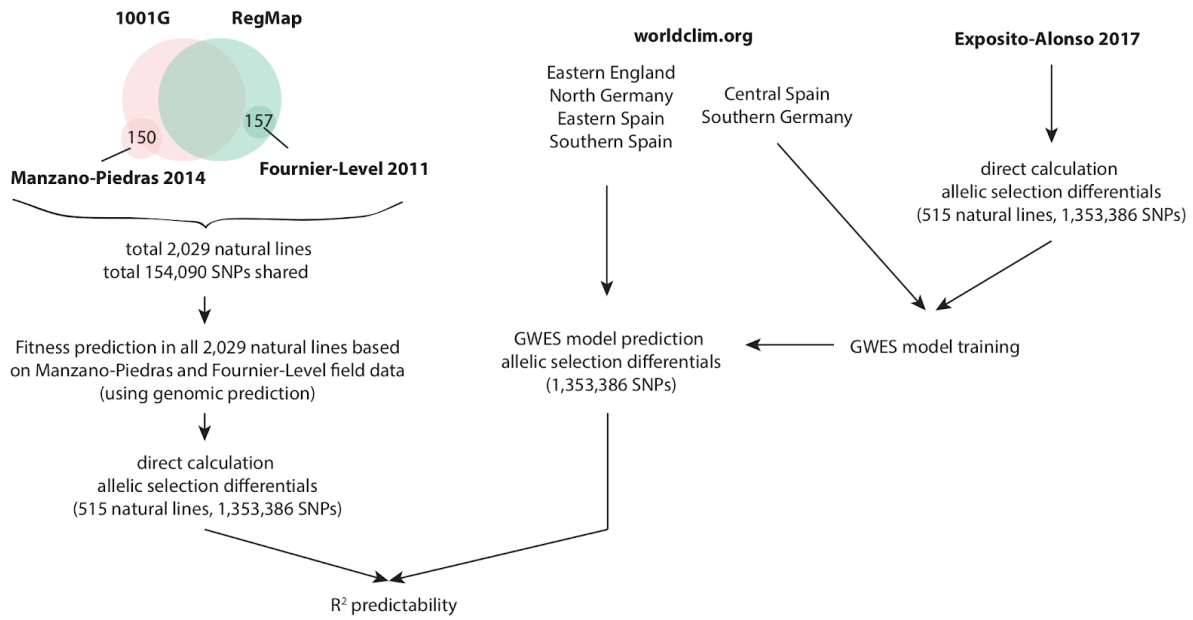

781 **Conceptual workflow on field validation procedure with data from published experiments.**

782 **Figure S13. Null expectation of predictability**

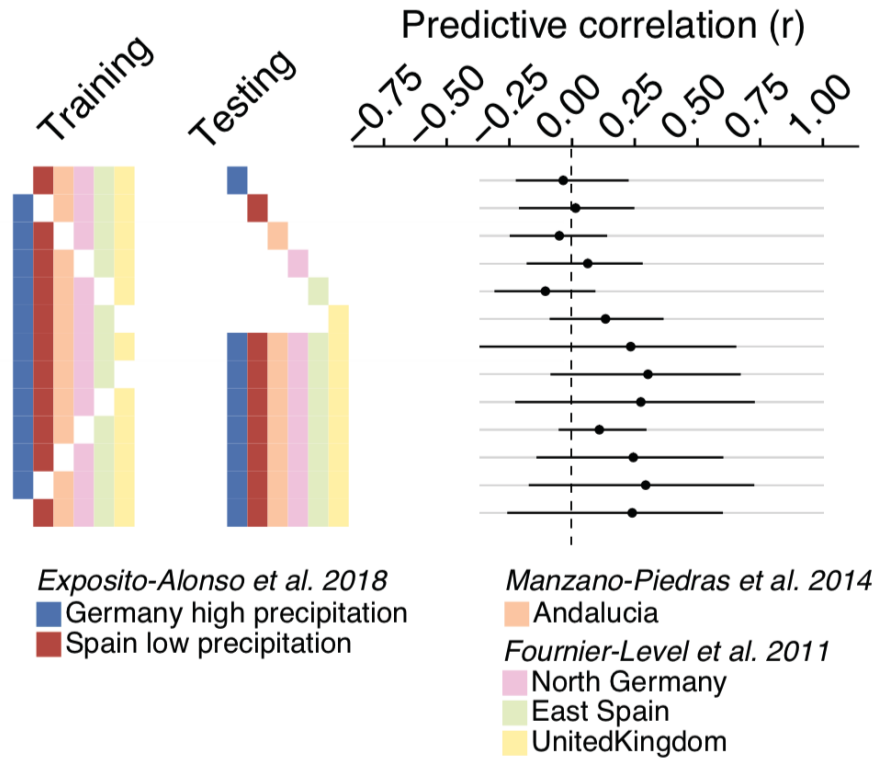

783 Same as Fig. 3, but with randomized fitness values associated to genotypes. We could not find any  
784 model combination that had non-zero predictability (95% bootstrap confidence overlaps with zero).  
785 This proof of concept indicates that the predictability we find must have a biological basis, in which  
786 the combination of climate of origin for a genetic variant and the local climate allows to infer  
787 selection over such a variant.

788 **Figure S14. Change in selection relative to local diversity**

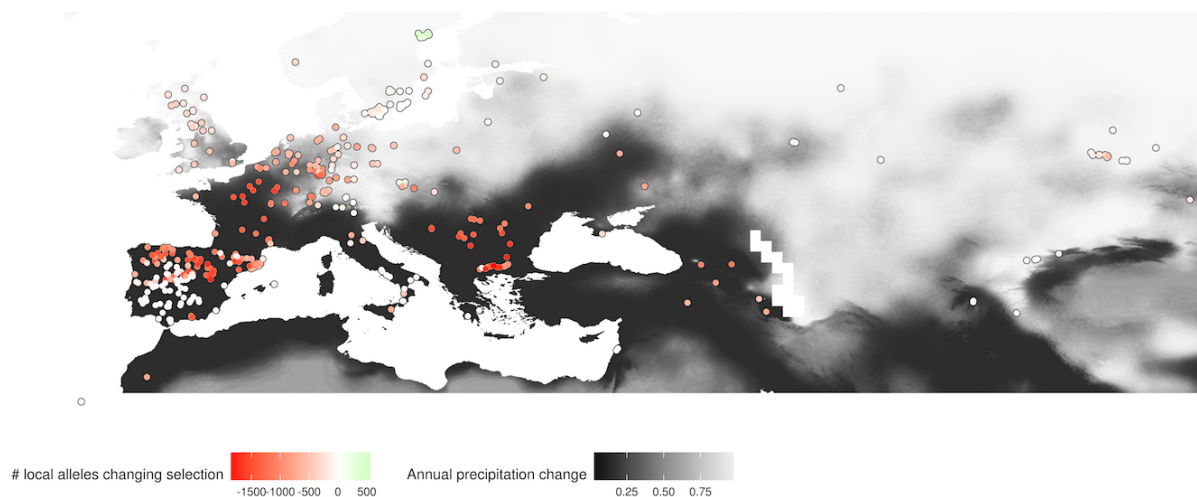

789 Same as Fig. 3D, but counting the number of local alleles increasing or decreasing in selection (total  
790 n=10,752 SNPs). Only changes with more than 5% advantage/disadvantage were considered (defined  
791 *a posteriori* from Bonferroni-significant alleles, which generated at least 5% effect in fitness).

792 **SUPPLEMENTAL TABLES & DATASETS**

793 Supplemental tables are available in the online version of the paper with [doi: xyz](#).

794 **Table S1. List of accessions**

795 The 1001 Genomes Project identifier, country of origin, and latitude and longitude are reported.

796 **Table S2. Summary of fitness data**

797 Average survival, fecundity, and lifetime fitness. Total number of genotypes with at least one  
798 surviving replicate per experiment. (Abbreviations: The three characters of the codes: MLI, MLP, MHI,  
799 MHP, TLI, TLP, THI, TLP; indicate M=Madrid (Spain), T=Tübingen (Germany), L=Low precipitation,  
800 H=High precipitation, I=Individual replicates (one plant per pot), P=Population replicates (up to 30  
801 plants per pot).

802 **Table S3. Heritability of traits**

803 Broad sense heritability per trait (variance explained by line genotype), as calculated from a  
804 generalized linear mixed model, is reported as:  $\sigma_g/\sigma_{Total}$ . The proportion of variance explained by  
805 nuisance factors such as block (tray), position of the tray within a treatment block, and position of  
806 plant within a tray are reported in the same way. (Abbreviations: The three characters of the codes:  
807 MLI, MLP, MHI, MHP, TLI, TLP, THI, TLP; indicate M=Madrid (Spain), T=Tübingen (Germany), L=Low  
808 precipitation, H=High precipitation, I=Individual replicates (one plant per pot), P=Population  
809 replicates (up to 30 plants per pot).

810 **Table S4. Number of SNPs with significant selection differentials**

811 All significant variants from marginal GWA after FDR and Bonferroni correction and all variants with  
812 non-zero probability of inclusion from conditional GWA, and sharing of significant variants across  
813 experiments.

814 **Table S5. Expected allele frequency changes in response to selection**

815 Summaries of allele frequency changes per experiment.

816 **Table S6. Variable importance of predictive models**

817 Sharing of significant variants across experiments.

818 **Table S7. Predictability of environmental models**

819 After training GWES models with a set of experiments, we inferred allelic selection differentials on  
820 another set of experiments and compared those with the real allelic selection differentials. We  
821 calculated Pearson's product-moment correlation  $r$  and % of variance explained  $R^2$  using a  
822 regression. 95% confidence intervals were calculated with 100 bootstrap replicates.

823 **Table S8. Description of climate variables**

824 Climate variables used for environmental models are described and their sources reported.

825 **Table S9. GBLUP heritability and imputation accuracy of data from published field experiments**

826 We used GBLUP to impute fitness from Fournier-Level et al. (2011) and Manzano-Piedras et al. (2014)  
827 into our 517 global accessions. We report heritability, Pearson's  $r$  between GBLUP predicted fitness  
828 and real fitness, and the significance of the correlation test.

829 **Table S10. Correlation between inferred natural selection intensity and other variables**

830 Spearman's  $r$  between selection intensity and diversity metrics or climate metrics is given.

831 **SUPPLEMENTAL REFERENCES**

- 832 50. Danecek, P. *et al.* The variant call format and VCFtools. *Bioinformatics* **27**, 2156–2158 (2011).
- 833 51. Cingolani, P. *et al.* A program for annotating and predicting the effects of single nucleotide  
834 polymorphisms, SnpEff: SNPs in the genome of *Drosophila melanogaster* strain w1118; iso-2;  
835 iso-3. *Fly* **6**, 80–92 (2012).
- 836 52. Purcell, S. *et al.* PLINK: a tool set for whole-genome association and population-based linkage  
837 analyses. *Am. J. Hum. Genet.* **81**, 559–575 (2007).
- 838 53. Hadfield, J. D. MCMC methods for multi-response generalized linear mixed models: the  
839 MCMCglmm R package. *J. Stat. Softw.* **33**, 1–22 (2010).
- 840 54. Kirkpatrick, M., Johnson, T. & Barton, N. General models of multilocus evolution. *Genetics* **161**,  
841 1727–1750 (2002).
- 842 55. Mitchell-Olds, T. Pleiotropy Causes Long-Term Genetic Constraints on Life-History Evolution in  
843 *Brassica rapa*. *Evolution* **50**, 1849–1858 (1996).
- 844 56. Novembre, J. & Barton, N. H. Tread Lightly Interpreting Polygenic Tests of Selection. *Genetics*  
845 **208**, 1351–1355 (2018).
- 846 57. Shriner, D. Overview of admixture mapping. *Curr. Protoc. Hum. Genet.* **1**, 1.23.1–1.23.6 (2013).
- 847 58. Yu, J. *et al.* A unified mixed-model method for association mapping that accounts for multiple  
848 levels of relatedness. *Nat. Genet.* **38**, 203–208 (2006).
- 849 59. Dr, F., Mt, W., Ja, A., Ts, S. & Zm, E. EcoHydrology: A community modeling foundation for  
850 Eco-Hydrology. (2014).
- 851 60. Golicher, D. Implementing a bucket model using WorldClim layers. (2012). Available at:  
852 <https://rpubs.com/dgolicher/2964>.
- 853 61. Kuhn, M. Building Predictive Models in R Using the caret Package. *Journal of Statistical Software,*  
854 *Articles* **28**, 1–26 (2008).
- 855 62. Breiman, L. Random Forests. *Mach. Learn.* **45**, 5–32 (2001).
- 856 63. Liaw, A. & Wiener, M. Classification and Regression by randomForest. *R News* **2**, 18–22 (2002).



- 857 64. Platt, A. *et al.* The scale of population structure in *Arabidopsis thaliana*. *PLoS Genet.* **6**, e1000843  
858 (2010).
- 859 65. Endelman, J. B. Ridge Regression and Other Kernels for Genomic Selection with R Package  
860 rrBLUP. *Plant Genome* **4**, 250–255 (2011).
- 861 66. Exposito-Alonso, M., Brennan, A., Alonso-Blanco, C. & Picó, F. X. Spatio-temporal variation in  
862 fitness responses to contrasting environments in *Arabidopsis thaliana*. *Evolution (in press)*  
863 (2018).
